# Supplementary material for: Prevalence and determinants of persistent symptoms after infection with SARS-CoV-2: protocol for an observational cohort study (LongCOVID-study)
Source: PubMed Central journal article supplement — BMJ Open. 2022 Jul 1;12(7):e062439. doi: 10.1136/bmjopen-2022-062439 (PMC9251892; doi:10.1136/bmjopen-2022-062439), 2022-07-01
Supplement: bmjopen-2022-062439.draft_revisions.pdf [file bmjopen-2022-062439.draft_revisions.pdf]

# BMJ Open

BMJ Open is committed to open peer review. As part of this commitment we make the peer review history of every article we publish publicly available.

When an article is published we post the peer reviewers' comments and the authors' responses online. We also post the versions of the paper that were used during peer review. These are the versions that the peer review comments apply to.

The versions of the paper that follow are the versions that were submitted during the peer review process. They are not the versions of record or the final published versions. They should not be cited or distributed as the published version of this manuscript.

BMJ Open is an open access journal and the full, final, typeset and author-corrected version of record of the manuscript is available on our site with no access controls, subscription charges or pay-per-view fees (<http://bmjopen.bmj.com>).

If you have any questions on BMJ Open's open peer review process please email [info.bmjopen@bmj.com](mailto:info.bmjopen@bmj.com)

# BMJ Open

## Prevalence and determinants of persistent symptoms after infection with SARS-CoV-2: Protocol for an observational cohort study (LongCOVID-study)

|                               |                                                                                                                                                                                                                                                                                                                                                                        |
|-------------------------------|------------------------------------------------------------------------------------------------------------------------------------------------------------------------------------------------------------------------------------------------------------------------------------------------------------------------------------------------------------------------|
| Journal:                      | <i>BMJ Open</i>                                                                                                                                                                                                                                                                                                                                                        |
| Manuscript ID                 | bmjopen-2022-062439                                                                                                                                                                                                                                                                                                                                                    |
| Article Type:                 | Protocol                                                                                                                                                                                                                                                                                                                                                               |
| Date Submitted by the Author: | 03-May-2022                                                                                                                                                                                                                                                                                                                                                            |
| Complete List of Authors:     | Mutubuki, Elizabeth; RIVM<br>van der Maaden, Tessa; RIVM<br>Leung, Ka Yin; RIVM<br>Wong, Albert; RIVM<br>Tulen, Anna D.; RIVM<br>de Bruijn, Siméon; RIVM<br>Haverman, Lotte; Amsterdam Universitair Medische Centra<br>Knoop, H.; Amsterdam UMC Locatie VUmc, Medical Psychology<br>Franz, Eelco; RIVM<br>van Hoek, Albert Jan; RIVM,<br>van den Wijngaard, Cees; RIVM |
| Keywords:                     | COVID-19, EPIDEMIOLOGY, HEALTH ECONOMICS                                                                                                                                                                                                                                                                                                                               |
|                               |                                                                                                                                                                                                                                                                                                                                                                        |

SCHOLARONE™  
Manuscripts

1  
2  
3  
4  
5  
6 Prevalence and determinants of persistent symptoms after  
7 infection with SARS-CoV-2: Protocol for an observational  
8 cohort study (LongCOVID-study)  
9  
10  
11  
12  
13

14 Elizabeth N. Mutubuki<sup>1</sup>, Tessa van der Maaden<sup>1</sup>, Ka Yin Leung<sup>1</sup>, Albert Wong<sup>1</sup>,  
15 Anna D. Tulen<sup>1</sup>, Siméon de Bruijn<sup>1</sup>, Lotte Haverman<sup>2</sup>, Hans Knoop<sup>3</sup>, Eelco  
16 Franz<sup>1</sup>, Albert Jan van Hoek<sup>1</sup>, Cees C. van den Wijngaard<sup>1</sup>  
17  
18  
19  
20

21 <sup>1</sup>National Institute for Public Health and the Environment (RIVM), Center for Infectious Disease  
22 Control, Bilthoven, the Netherlands  
23

24 <sup>2</sup>Emma Children's Hospital, Amsterdam UMC, University of Amsterdam, Child and Adolescent  
25 Psychiatry & Psychosocial Care, Amsterdam Reproduction and Development, Amsterdam Public  
26 Health, Amsterdam, the Netherlands.  
27  
28

29 <sup>3</sup>Department of Medical Psychology, Amsterdam University Medical Centers, University of  
30 Amsterdam, Amsterdam Public Health Research Institute, Amsterdam, the Netherlands.  
31  
32  
33  
34  
35  
36  
37  
38  
39  
40  
41  
42  
43  
44  
45  
46  
47  
48  
49  
50  
51  
52  
53  
54  
55  
56  
57

58 **Corresponding author:** Elizabeth N Mutubuki

59 email address: elizabeth.mutubuki@rivm.nl  
60

## Abstract

**Introduction:** A substantial proportion of individuals infected with severe acute respiratory syndrome coronavirus-2 (SARS-CoV-2) report persisting symptoms weeks and months following acute infection. Estimates on prevalence vary due to differences in study designs, populations, heterogeneity of symptoms and the way symptoms are measured. Common symptoms include fatigue, cognitive impairment and dyspnea. However, knowledge regarding the nature and risk factors for developing persisting symptoms is still limited. Hence in this study we aim to determine the prevalence, severity, risk factors and impact on quality of life of persisting symptoms in the first year following acute SARS-CoV-2 infection.

**Methods and analysis:** The LongCOVID-study is both a prospective and retrospective cohort study with a one year follow up. Participants aged 5 years and above with self-reported positive or negative tests for SARS-CoV-2 will be included in the study. The primary outcome is the prevalence and severity of persistent symptoms in participants that tested positive for SARS-CoV-2 compared to controls. Symptom severity will be assessed for fatigue using the Checklist Individual Strength (CIS subscale fatigue severity), pain (Rand-36/SF-36 subscale bodily pain), dyspnea (Medical Research Council (mMRC)) and cognitive impairment using the Cognitive Failure Questionnaire (CFQ). Secondary outcomes include loss of health-related quality of life (HRQoL) and risk factors for persisting symptoms following infection with SARS-CoV-2.

**Ethics and dissemination:** The Utrecht Medical Ethics Committee (METC) declared in February 2021 that the Medical Research Involving Human Subjects Act (WMO) does not apply to this study (METC protocol number 21-124/C).

Keywords: SARS-CoV-2, post COVID-19 condition, LongCovid, prevalence, HRQoL, risk factors

### Strength and limitations of this study

- A prospective design, allowing for detailed analysis of the prevalence and risk factors of persistent symptoms of SARS CoV-2 infection.
- Presence of control groups that allows for comparison of COVID-19 cases to controls. that have similar experiences, such as lock down measures. This is important because such factors can influence complaints
- The use of validated questionnaires with validated cut-off scores for severity is another strength of this study.
- Repeated assessment of symptoms every three months during one year of follow-up will enable assessment of the time course of symptoms, and detection of disabling symptoms at every 3 months interval.
- Furthermore, the impact of symptoms on general functioning will be assessed.
- A limitation of this study is that severity scores of only four of symptoms associated with COVID-19 will be calculated to get more insight into clinical significance.

### Introduction

During the first months of the pandemic, epidemiological research focused primarily on the spread of Severe Acute Respiratory Syndrome Coronavirus-2 (SARS-CoV-2) and on treatment of those with severe or fatal illness (1). The effects of SARS-CoV-2 infection vary from asymptomatic infection, through to critical and chronic disease (2). Although most individuals infected with SARS-CoV-2 fully recover, there is a growing body of evidence that suggests that a substantial number of individuals remain with long-term complications or persisting symptoms (3-5).

COVID-19 varies in clinical presentation, disease severity, recovery time as well as completeness of recovery (6). A delay in recovery whereby individuals fail to return to their normal daily routines and still report lasting effects of the infection long after the expected period of recovery has been termed "LongCOVID" (7), "long-haulers" (8) and "post COVID-19 condition" (9). The term post COVID-19 condition will be used in the rest of this article. Post COVID-19 condition is reported to occur in individuals that have a history of probable or confirmed SARS-CoV-2 infection, usually 3 months from the onset of COVID-19 and symptoms with a duration of at least 2 months that cannot be explained by alternative diagnosis (9). Fatigue, shortness of breath, cognitive dysfunction are some of the common symptoms (9). Symptoms may persist from initial infection, be a new onset following initial recovery from an acute COVID-19 episode or may also fluctuate or relapse over time (9).

1  
2  
3 Over 210 million confirmed cases of COVID-19 have been reported, and of those, an estimated 10-  
4 20% are reported to experience such persisting symptoms for weeks and months following acute  
5 SARS-CoV2 infection (9). However, higher incidence rates of persisting symptoms have been  
6 reported, for example through self-surveys of patient from long COVID peer support groups (10) as  
7 well as in hospitalized patients (11). Variation in the reported incidence and prevalence rates of post  
8 COVID-19 condition can be attributed to the complexity of the syndrome, differences in population  
9 groups, heterogeneity in clinical presentation of symptoms, little knowledge regarding the natural  
10 history and clinical course (12) and in the way symptoms are measured. Common persistent  
11 symptoms are shortness of breath, fatigue, dyspnea and headaches (13, 5). Some of the initial acute  
12 symptoms such as cough, fever, and chills become less prevalent as the illness progresses, whereas  
13 cognitive dysfunction and palpitations become more prevalent later in the illness (5).

14  
15 A good overview of the nature of persisting symptoms following an acute infection with SARS-CoV-2,  
16 can enable better diagnosis, management and may reduce negative consequences on HRQoL (12).  
17 Hence in this study we aim to determine the prevalence and severity of persisting symptoms in the  
18 first year of infection, in individuals infected by SARS-CoV-2 compared to individuals that were not  
19 infected. In addition risk factors for developing post COVID-19 condition and its impact on health will  
20 be analyzed.

## 21 22 **Methods and analysis**

### 23 **Study aim and design**

24 The LongCOVID-study is an observational cohort study consisting of prospective and retrospective  
25 data with one year of follow up. The study aims to determine the prevalence, severity, health impact  
26 and risk factors associated with persistent symptoms following a SARS-CoV-2 infection, in cases  
27 compared to population controls and test-negative controls. The study is carried out by the Dutch  
28 National Institute for Public Health and the Environment (RIVM), Bilthoven, the Netherlands. The  
29 Utrecht Medical Ethics Committee (METC) declared in February 2021 that the Medical Research  
30 Involving Human Subjects Act (WMO) does not apply to this study (METC protocol number 21-  
31 124/C). Patients or the public were not involved in the designing, conducting, implementing and  
32 dissemination plans of the research

### 33 **Study population**

34 Both the prospective and retrospective cohorts include children (ages 5-17) and adults (18 years and  
35 above).

#### 36 *Prospective cohort study*

1  
2  
3 Participants with a positive SARS-CoV-2 infection test result on an antigen or polymerase chain  
4 reaction (PCR) test for acute infection, are included in the study as cases, if they complete the  
5 baseline questionnaire within 7 days of testing positive. Participants that test negative to SARS-CoV-  
6 2 infection and complete their baseline questionnaire within 7 days of testing negative, are included  
7 in the study as test-negative controls. A second group of controls, population controls, consists of  
8 randomly selected participants from the Basic Registration of Persons (BRP) without a positive test  
9 for SARS-CoV-2 infection or known history of probable infections.

#### 15 *Retrospective cohort study*

16  
17 Participants presenting with self-reported persisting symptoms associated with SARS-CoV-2 infection  
18 with or without having had a positive test result were included in the retrospective cohort study as  
19 post COVID-19 condition cases.  
20  
21

#### 22 **Recruitment**

23  
24 Figure 1 shows the flow diagram of participant recruitment in the LongCOVID-study. Participants are  
25 recruited through the following three ways;  
26  
27

#### 28 *Via the Community Health Service*

29  
30 Individuals testing positive and negative to COVID-19 at one of the community health services  
31 (GGDs) are invited to participate in the LongCOVID-study. Registration to participate is via the  
32 LongCOVID-study website.  
33  
34

#### 35 *Basic Registration of Persons (BRP)*

36  
37 Population controls are randomly selected from the basic registration of persons and invited by  
38 letter to participate in the study.  
39  
40

#### 41 *Self-registered participants*

42  
43 Individuals interested in participating in the LongCovid-study can also self-register through the study  
44 website (longcovid.rivm.nl). Test-negative controls, cases and post COVID-19 condition cases can be  
45 included in the study this way.  
46  
47  
48  
49

50  
51 *Figure 1: Recruitment of participants in the LongCOVID-study*

#### 52 **Patient and public involvement**

53  
54 No patient involved.  
55  
56  
57  
58  
59  
60

## Measurements (adults)

Table 1 shows different measurement moments where data is collected in form of questionnaires. At baseline, data on demographical characteristics such as gender, education level and employment are collected. Data on comorbidities is reported at baseline and at 12 months. Information regarding testing for SARS-CoV-2, COVID-19 related complaints and vaccination data is collected at baseline and at 3, 6, 9 and 12 months.

### *Health related quality of life (EQ-5D-5L and Rand-12/SF-12)*

HRQoL is assessed using the Rand-12/SF-12 and EQ-5D-5L. Additional weekly measurement using the EQ-5D-5L were carried out in individuals presenting with acute symptoms in the first 8 weeks following a positive COVID-19 test. The EQ-5D-5L questionnaire consists of five dimensions of health (mobility, self-care, usual activities, pain/discomfort, and anxiety/ depression), with five levels of response and a visual analogue scale (EQ VAS). The EQ-5D-5L scores will be converted into utility scores using the Dutch tariff (14), ranging from 0 (death) to 1 (optimal health).

The Rand-12/SF-12, a shortened version of the Rand-36/SF-36 HRQoL questionnaire consists of 12 questions from the following 8 domains; physical functioning, physical role, emotional role limitations, social functioning, physical pain, general mental health, vitality and general health perception. The 8 domains can be summarized into a physical and mental health domain (15). Health scores will be converted into utility scores using the SF-6D (Short-Form Six-Dimension). Quality adjusted life years will be calculated by multiplying the utility scores by the time a patient spends in a given health state.

### *Fatigue (Checklist Individual Strength [CIS])*

Fatigue severity is assessed using the subscale fatigue severity of the Checklist Individual Strength (CIS). The CIS subscale fatigue is a 8-item fatigue questionnaire (16). Each item is scored on a 7-point Likert scale. Scores range from 8 to 56, and scores of 35 and higher indicate severe fatigue (17).

### *Cognitive function (Cognitive Failure Questionnaire [CFQ])*

Cognitive function is assessed using the Cognitive Failure Questionnaire (CFQ). The CFQ ranges from 0 to a 100 with higher scores indicating more cognitive impairment (18). A score of 44 or higher indicated clinically significant complaints on cognitive function.

### *Pain (bodily pain subscale of the Rand-36/SF-36 Health Status Inventory [Rand-36])*

The bodily pain subscale of the Rand-36 Health Status Inventory (Rand-36) is used to assess pain severity. The Rand-36 scores range from 0 to 100, higher scores indicate better health status.



1  
2  
3 Significant impairment due to pain is reflected by a score of 55 or lower, based on Dutch norm  
4 scores (19). The subscales physical and social functioning were also used.  
5

6  
7 *Dyspnea (Medical Research Council (dyspnea) [mMRC])*  
8

9  
10 Dyspnea is assessed using the modified Medical Research Council (dyspnea) (mMRC). The mMRC  
11 scale ranges from grade 0 to 4. Grade 0- breathless with strenuous exercise; Grade 1- short of breath  
12 when hurrying on level ground or walking up a slight hill; Grade-2 walks slower on level ground  
13 because of breathlessness or stops for a breath when walking at own pace; Grade 3- stops for breath  
14 after walking about 100 yards or after a few minutes on level ground and Grade 4- am too breathless  
15 to leave the house or I am breathless when dressing (20). A score of 1 or higher reflecting significant  
16 impairment due to dyspnea (21).  
17

18  
19  
20  
21  
22 *Illness and related beliefs (The Brief Illness Perception Questionnaire [Brief IPQ])*  
23

24  
25 The Brief Illness Perception Questionnaire (Brief IPQ /IPQ-K) is a nine-item scale to assess the  
26 cognitive and emotional representations of illness including consequences, timeline, personal  
27 control, treatment control, identity, coherence, concern, emotional response and causes (22). Item  
28 scores increases, represent linear increases in the dimension measured. The Brief IPQ is reported to  
29 have good test-retest reliability (22).  
30  
31

32  
33  
34 *Anxiety (Hospital Anxiety and Depression Scale [HADS])*  
35

36  
37 HADS (Hospital Anxiety and Depression Scale) is a 14 item self-report questionnaire designed to  
38 measure anxious and depressive states in patients with two subscales (23). The sum score per  
39 subscale ranges from 0 to 21. Scores between 0-7 indicate no anxiety or depression, 8-10 mild cases,  
40 11-15 moderate cases and 16 or above severe cases (Snaith 1994).  
41

42  
43 *Dyspnea (The Nijmegen Clinical Screening Instrument [NCSI])*  
44

45  
46 The Nijmegen Clinical Screening Instrument (NCSI) measures health status and has the following  
47 domains, physiological functioning, symptoms, functional impairment, and quality of life as main  
48 domains (24), and 8 subdomains (25). The 8 subdomains include subjective symptoms, dyspnea  
49 emotions, fatigue, behavioral impairment, subjective impairment, general quality of life (general  
50 QoL), health related quality of life (HRQoL) and satisfaction with relations (25). Each subdomain is  
51 expressed as a single score on its own scale, with higher NCSI scores indicate more problems (24). In  
52 the study the subdomain dyspnea will be used.  
53  
54  
55  
56

57  
58 *Absenteeism (iMTA Productivity Cost Questionnaire [iPCQ])*  
59  
60

1  
2  
3 Participants were asked to report the number of days that they had been absent from work due to  
4 illness. Absenteeism will be measured using the iPCQ.  
5

#### 6 *Unpaid Productivity losses and informal care*

7  
8  
9 Unpaid productivity losses from work, studies, voluntary work as well as informal care will be valued  
10 using the Dutch shadow price of 14,57 euros per hour (26).  
11

### 12 **Measurements (children)**

13  
14 Below are age-specific scales that were used in children (aged 5-17 years), that replaced some of the  
15 above described scales for adults (Table 1).  
16

#### 17 *Physical function (Pediatric Quality of Life Inventory [PedsQL])*

18  
19 The PedsQL is a HRQoL measure consisting of 4 subscales (physical functioning, emotional  
20 functioning, social functioning and school functioning) which can be computed to two summary  
21 scores (psychosocial and physical health summary scores). Dutch norms are available which allow  
22 comparison with the general population (27). A parent proxy of the PedsQL will be used for children  
23 aged 5-7 years.  
24

#### 25 *Fatigue (Pediatric Quality of Life Inventory Fatigue Scale [PedsQL fatigue]).*

26  
27 Fatigue severity in children will be assessed with the Pediatric Quality of Life Inventory Fatigue Scale  
28 (PedsQL fatigue). This 18-item PedsQL fatigue scale comprises the general fatigue scale (6 items),  
29 sleep/rest fatigue scale (6 items), and cognitive fatigue scale (6 items) and is a reliable and valid  
30 instrument to measure fatigue in children (28). Dutch norm scores are available (29). A parent proxy  
31 will be used for children aged 5-7 years.  
32

#### 33 *Illness and related beliefs (The Brief Illness Perception Questionnaire [Brief IPQ])*

34  
35 The Brief Illness Perception Questionnaire (Brief IPQ /IPQ-K-parents) will be completed by a proxy  
36 (22), and by the child if they are aged 10 or older.  
37

#### 38 *Pain Visual analogue scale (VAS)*

39  
40 Pain severity will be assessed using VAS (30). Scores range from 0 (no pain) to a 100 ( worst  
41 imaginable pain). A parent proxy will be used for children aged 5-7 years.  
42

#### 43 *Health related quality of life (EQ-5D-Y)*

44  
45 Weekly measurement moments for up to 8 weeks in children presenting with acute symptoms  
46 follow a positive COVID-19 test, will be carried out. The EQ-5D-Y-Proxy1 will be used for children  
47  
48  
49  
50  
51  
52  
53  
54  
55  
56  
57  
58  
59  
60

1  
2  
3 aged 5-7 years, and the EQ-5D-Y will be used for children aged 8-17 years to measure HRQoL. The  
4 EQ-5D-Y-Proxy<sup>1</sup> and EQ-5D-Y questionnaires consist of five dimensions (mobility, self-care, usual  
5 activities, pain/discomfort, and anxiety/ depression), with three levels of response and a visual  
6 analogue scale (EQ VAS)(31).  
7  
8  
9

### 10 *Dyspnea (Patient-Reported Outcomes Measurement Information System [PROMIS])*

11  
12  
13 Dyspnea will be assessed in children aged 5-7 years using an adjusted Patient-Reported Outcomes  
14 Measurement Information System (PROMIS) Asthma impact Short form Proxy and in children 8-17  
15 using an adjusted PROMIS Asthma impact Short form(32).  
16  
17

### 18 *Cognitive function and behaviour (PROMIS and SDQ)*

19  
20  
21 Loneliness will be assessed in children aged 5-7 years using the PROMIS short form proxy depressive  
22 symptoms and in children 8-17 using the PROMIS short form depressive symptoms, for which norm  
23 scores are available which allow comparison with the general population (32, 33) . In addition the  
24 strengths and difficulties questionnaire (SDQ) will be used as well to assess the level of depressive  
25 symptoms, with a proxy for parents in the 5-11 years of age (34).  
26  
27  
28  
29

### 30 **Measurements (acute cohort)**

31  
32 Data on HRQoL and acute symptoms will be collected weekly in the first 8 weeks following infection.  
33 Data collection will stop when the symptoms stop or end at 8 weeks following infection.  
34  
35

### 36 **Outcome measures**

#### 37 *Primary outcome*

- 38  
39  
40  
41  
42  
43  
44  
45  
46  
47  
48  
49
1. The first primary outcome measure is the prevalence and severity of persistent symptoms in patients that tested positive for COVID-19 infection compared to both test-negative controls and population controls. Severity of symptoms will be assessed for fatigue, pain, dyspnea, and cognitive impairment using standardized questionnaires, with population-based norm cut-off scores for clinically significant severity.

#### 50 *Secondary outcomes include:*

- 51  
52  
53  
54  
55  
56  
57  
58  
59  
60
1. Factors that predict post COVID-19 condition following an acute SARS-CoV-2 infection at different follow up moments.
  2. Healthcare utilization in the first year following infection with SARS-CoV-2 in cases compared to controls (test-negative controls and population controls) will be assessed.
  3. Health related quality of life in cases will be compared to that of controls (test-negative controls and population controls) in the first year following infection. Additionally a

comparison will also be made between post COVID-19 condition individuals and individuals that test positive for COVID-19 but do not develop post COVID-19 condition.

Table 1: Measurement moments

|                                                                                                                         | Baseline | Acute symptoms (in weeks) |   |   |   |   |   |   |   | 3 months | 6 months | 9 months | 12 months |
|-------------------------------------------------------------------------------------------------------------------------|----------|---------------------------|---|---|---|---|---|---|---|----------|----------|----------|-----------|
|                                                                                                                         |          | 1                         | 2 | 3 | 4 | 5 | 6 | 7 | 8 |          |          |          |           |
| Informed consent                                                                                                        | X        |                           |   |   |   |   |   |   |   |          |          |          |           |
| Baseline characteristics                                                                                                | X        |                           |   |   |   |   |   |   |   |          |          |          |           |
| Vaccination data (status, type, date)                                                                                   | X        |                           |   |   |   |   |   |   |   | X        | X        | X        | X         |
| Health utilization (contact with healthcare providers, medication use)                                                  | X        |                           |   |   |   |   |   |   |   | X        | X        | X        | X         |
| Symptoms data                                                                                                           | X        | X                         | X | X | X | X | X | X | X | X        | X        | X        | X         |
| HRQoL (EQ-5D*/EQ-5D-Y**)                                                                                                |          | X                         | X | X | X | X | X | X | X |          |          |          |           |
| Health utilization (contact with healthcare providers, medication use)                                                  | X        |                           |   |   |   |   |   |   |   | X        | X        | X        | X         |
| Vaccination data (status, type, date)                                                                                   | X        |                           |   |   |   |   |   |   |   | X        | X        | X        | X         |
| Co-morbidities                                                                                                          | X        |                           |   |   |   |   |   |   |   |          |          |          | X         |
| <b>Adults</b>                                                                                                           |          |                           |   |   |   |   |   |   |   |          |          |          |           |
| HRQoL (Rand-12/EQ-5D)                                                                                                   | X        |                           |   |   |   |   |   |   |   | X        | X        | X        | X         |
| Pain, Physical function and Social function (Rand-36/SF-36 subscales pain, social functioning and physical functioning) | X        |                           |   |   |   |   |   |   |   | X        | X        | X        | X         |
| Cognitive function (CFQ)                                                                                                | X        |                           |   |   |   |   |   |   |   | X        | X        | X        | X         |
| Fatigue (CIS)                                                                                                           | X        |                           |   |   |   |   |   |   |   | X        | X        | X        | X         |
| Illness and related beliefs (Brief IPQ)                                                                                 | X        |                           |   |   |   |   |   |   |   | X        | X        |          |           |
| Anxiety and depression (HADS)                                                                                           | X        |                           |   |   |   |   |   |   |   | X        | X        |          |           |
| Dyspnea (mMRC)                                                                                                          | X        |                           |   |   |   |   |   |   |   | X        | X        | X        | X         |
| Dyspnea (NCSI)                                                                                                          | X        |                           |   |   |   |   |   |   |   | X        | X        | X        | X         |
| <b>Children</b>                                                                                                         |          |                           |   |   |   |   |   |   |   |          |          |          |           |
| Physical function (PedsQL subscale physical health)                                                                     | X        |                           |   |   |   |   |   |   |   | X        | X        | X        | X         |
| Fatigue (PedsQL fatigue)                                                                                                | X        |                           |   |   |   |   |   |   |   | X        | X        | X        | X         |
| Illness and related beliefs (Brief IPQ / brief IPQ-parents)                                                             | X        |                           |   |   |   |   |   |   |   | X        | X        |          |           |
| Pain (VAS)                                                                                                              | X        |                           |   |   |   |   |   |   |   | X        | X        | X        | X         |
| Dyspnea (adjusted PROMIS Asthma)                                                                                        | X        |                           |   |   |   |   |   |   |   | X        | X        | X        | X         |
| Depressive symptoms (PROMIS, SDQ)                                                                                       | X        |                           |   |   |   |   |   |   |   | X        | X        |          | X         |

## Statistical analysis

Baseline characteristics of the participants in all groups will be presented using descriptive statistics mean (standard deviation), median (range), or proportion to assess if there is a balance in the groups regarding distribution of prognostic factors such as age, gender, co-morbidity and education.

## Prospective study

### Primary outcome analysis

1. Prevalence and severity of persistent symptoms in COVID-19 patients

Descriptive epidemiological statistical methods will be used to analyze prevalence of persistent symptoms at 3, 6, 9 and 12 months in cases compared to both control groups (test-negative controls and population controls). Persisting symptoms are defined as symptoms in cases with a duration of at least 2 months. Such symptoms markedly elevated in cases compared to controls (test-negative controls and/or population controls) during follow up are likely to be associated with COVID-19, and cases with these symptoms are in this study defined as cases with possible post COVID-19 condition (yes/no). Severity scores of fatigue, dyspnea, cognitive functioning, and pain will be calculated. Scores of individuals with confirmed COVID-19 will be compared to those of controls, per follow-up moment (baseline, 3, 6, 9 and 12 months follow-up).

### Secondary outcome analysis

1. *Predictors of post-COVID 19 condition*

A prediction model will be built to identify predictors of post COVID-19 condition. The outcome will be having possible post COVID-19 condition as defined above. To determine the prediction model that best suits our data, the prediction model will be constructed using super learning (35). The prediction model will be evaluated using the ROC-AUC metric (36).

2. Predictors of healthcare utilization in post COVID-19 condition

A second prediction model will be performed to identify predictors of healthcare utilization in post COVID-19 condition. Healthcare utilization is defined as contact (visit to the general practitioner, telephone call, hospitalization, emergency healthcare services, other medical health professionals/services) with a health provider regarding symptoms attributed by the patient to COVID-19 or post COVID-19 condition (yes/no). The prediction model will be performed as mentioned above.

3. Quality-adjusted life-years

1  
2  
3 HRQoL will be assessed using EQ-5D-5L and Rand-12/SF-6D. Quality-adjusted life-years (QALYs),  
4 which takes into account both the impact of length and the quality-of-life will be calculated and be  
5 compared between cases and controls.  
6  
7

### 8 9 10 ***Retrospective study***

11 Descriptive epidemiological statistical methods will be used to analyze the prevalence of persistent  
12 symptoms at baseline in cases compared to both control groups (test-negative controls and  
13 population controls). Moreover, prevalence of co-morbidities will be quantified in cases and control  
14 groups. Additionally, an assessment into healthcare utilization for cases will be performed according  
15 to the aforementioned definition.  
16  
17  
18

### 19 20 21 ***Acute data following infection***

22 Descriptive epidemiological statistical methods will be used to describe the prevalence and the type  
23 of symptoms present following acute infection as well as health related quality of life.  
24  
25  
26  
27

### 28 29 ***Missing data***

30 The fraction of missing questionnaires at each time points and per period during the study (e.g., per  
31 3 months) in all patients with confirmed Covid-19 will be tabulated. Scenarios of dealing with missing  
32 data include a complete case analysis, multiple imputation, and linear interpolation combined with  
33 carry forward.  
34  
35  
36

### 37 38 ***Discussion***

39 The LongCOVID-study aims to determine the prevalence and severity of persistent symptoms  
40 following acute SARS-CoV2 infection in cases compared to controls, as well as to investigate the risk  
41 factors of developing persistent symptoms. Previous studies have explored prevalence of long-term  
42 symptoms and risk factors in various populations, i.e., in previously hospitalized patients (37),  
43 patients with diabetes type 1 and 2 (38, 39), in home-isolated patients with milder symptoms and in  
44 the young (40).  
45  
46  
47  
48

49  
50  
51  
52  
53  
54  
55  
56  
57  
58  
59  
60  
Blomberg reported that 61% of all the patients had persisting symptoms at 6 months (40). This  
included patients with a mild to moderate illness following initial illness as well as young patients  
(16-30 years). Persisting symptoms included loss of taste and or smell, fatigue, dyspnea, impaired  
concentration and memory problems. In a hospitalized population (37), fatigue, muscle weakness,  
sleep difficulties and anxiety or depression are the most prevalent symptoms at 6 months. Due to  
severe illness during hospital stay and impaired pulmonary function, the hospitalized population is a  
target group for long-term recovery (37, 41). Our study includes both adults and children from the

1  
2  
3 age of 5 with mostly mild to moderate acute symptoms and a much smaller group of patients that  
4 were hospitalized in the acute phase of the infection. We expect a possible bias against the number  
5 of hospitalized patients due to the design of the study, which requires questionnaires to be  
6 completed no more than seven days following a positive test for COVID-19.  
7  
8  
9

### 10 **Strengths and weakness**

11  
12  
13 Strengths of the current study include the prospective design, allowing for detailed analysis of the  
14 prevalence and risk factors of persistent symptoms of SARS CoV-2 infection. In addition this study is  
15 one of a few studies (42) that allows for comparison of COVID-19 cases to control groups that have  
16 similar experiences, such as lock down measures. This is important because such factors can  
17 influence complaints. The availability of the population control group in this study allows us to  
18 control for background prevalence of symptoms. In addition the use of test-negative controls allows  
19 for assessment of the impact of COVID-19 compared to other respiratory infections. The use of  
20 validated questionnaires with validated cut-off scores for severity is another strength of this study.  
21 Repeated assessment of symptoms every three months during one year of follow-up will enable  
22 assessment of the time course of symptoms, and detection of disabling symptoms at every 3 months  
23 interval. Furthermore, the impact of symptoms on general functioning will be assessed. A limitation  
24 of this study is that severity scores of only four of symptoms associated with COVID-19 will be  
25 calculated to get more insight into clinical significance. This is because only four standardized  
26 questionnaires for symptom severity were included in the study. Hence the severity of other  
27 possible symptoms related to COVID-19 will not be taken into account.  
28  
29  
30  
31  
32  
33  
34  
35  
36  
37  
38

39 In conclusion, the LongCOVID-study is expected to provide additional insights into the prevalence  
40 and severity of persistent symptoms after SARS CoV-2 infection to the international body of  
41 literature. In the Netherlands this is the first large scale study on persisting symptoms following  
42 SARS CoV2 infection.  
43  
44  
45

### 46 **Declarations**

47  
48 **Ethics approval and consent to participate:** All participants gave consent to participate in the study.  
49 Written consent is obtained online prior to being able to complete the study questionnaires, which  
50 are also completed online. The Utrecht Medical Ethics Committee (METC) declared in February 2021  
51 that the Medical Research Involving Human Subjects Act (WMO) does not apply to this study (METC  
52 protocol number 21-124/C).  
53  
54  
55

56  
57 **Authors' contributions:** ENM wrote the manuscript. KYL contributed to the methods. CCW, TM, AJH,  
58 ADT, KYL, AW contributed to the design of the study, LH and HK advised on the design of the  
59  
60

1  
2  
3 questionnaires, TM, AJH, ADT, KYL, ENM, EF, SB, CCW contributed to implementation of the data  
4 collection, all authors reviewed and contributed to drafts of the manuscript. All authors read,  
5 contributed to refinement of the study protocol and approved the manuscript.  
6  
7

8  
9 **Funding:** The study is executed by the National Institute for Public Health by order of the Ministry of  
10 Health. This means the study is not the result of a competitive grant. The Dutch Ministry of Health,  
11 Welfare and Sport does not have a role in the design of this study, its execution, analyses and  
12 interpretation of results.  
13

14 **Competing interests:** The authors have no conflict of interest to declare.  
15

16 **Word Count:** 3706  
17  
18  
19  
20  
21  
22  
23  
24  
25  
26  
27  
28  
29  
30  
31  
32  
33  
34  
35  
36  
37  
38  
39  
40  
41  
42  
43  
44  
45  
46  
47  
48  
49  
50  
51  
52  
53  
54  
55  
56  
57  
58  
59  
60

For peer review only



## References

1. Alwan NA. Surveillance is underestimating the burden of the COVID-19 pandemic. *Lancet*. 2020;396(10252):e24.
2. Ricke DO. Two Different Antibody-Dependent Enhancement (ADE) Risks for SARS-CoV-2 Antibodies. *Front Immunol*. 2021;12:640093.
3. Cirulli ET, Schiabor Barrett KM, Riffle S, Bolze A, Neveux I, Dabe S, et al. Long-term COVID-19 symptoms in a large unselected population. *medRxiv*. 2020:2020.10.07.20208702.
4. Petersen MS, Kristiansen MF, Hanusson KD, Danielsen ME, B ÁS, Gaini S, et al. Long COVID in the Faroe Islands: A Longitudinal Study Among Nonhospitalized Patients. *Clin Infect Dis*. 2021;73(11):e4058-e63.
5. Ziauddeen N, Gurdasani D, O'Hara ME, Hastie C, Roderick P, Yao G, et al. Characteristics of Long Covid: findings from a social media survey. *medRxiv*. 2021:2021.03.21.21253968.
6. Holmes E, Wist J, Masuda R, Lodge S, Nitschke P, Kimhofer T, et al. Incomplete Systemic Recovery and Metabolic Phenoreversion in Post-Acute-Phase Nonhospitalized COVID-19 Patients: Implications for Assessment of Post-Acute COVID-19 Syndrome. *Journal of Proteome Research*. 2021;20(6):3315-29.
7. Mahase E. Covid-19: What do we know about "long covid"? *Bmj*. 2020;370:m2815.
8. Baig AM. Deleterious Outcomes in Long-Hauler COVID-19: The Effects of SARS-CoV-2 on the CNS in Chronic COVID Syndrome. *ACS Chem Neurosci*. 2020;11(24):4017-20.
9. Organization WH. A clinical case definition of post COVID-19 condition by a Delphi consensus [https://www.who.int/publications/i/item/WHO-2019-nCoV-Post\\_COVID-19\\_condition-Clinical\\_case\\_definition-2021.12021](https://www.who.int/publications/i/item/WHO-2019-nCoV-Post_COVID-19_condition-Clinical_case_definition-2021.12021) [
10. Ladds E, Rushforth A, Wieringa S, Taylor S, Rayner C, Husain L, et al. Persistent symptoms after Covid-19: qualitative study of 114 "long Covid" patients and draft quality principles for services. *BMC Health Serv Res*. 2020;20(1):1144.
11. Carfi A, Bernabei R, Landi F, Group ftGAC-P-ACS. Persistent Symptoms in Patients After Acute COVID-19. *JAMA*. 2020;324(6):603-5.
12. Rando HM, Bennett TD, Byrd JB, Bramante C, Callahan TJ, Chute CG, et al. Challenges in defining Long COVID: Striking differences across literature, Electronic Health Records, and patient-reported information. *medRxiv*. 2021:2021.03.20.21253896.
13. Aiyegbusi OL, Hughes SE, Turner G, Rivera SC, McMullan C, Chandan JS, et al. Symptoms, complications and management of long COVID: a review. *J R Soc Med*. 2021;114(9):428-42.
14. Lamers LM, Stalmeier PF, McDonnell J, Krabbe PF, van Busschbach JJ. [Measuring the quality of life in economic evaluations: the Dutch EQ-5D tariff]. *Ned Tijdschr Geneesk*. 2005;149(28):1574-8.
15. Luo X, George ML, Kakouras I, Edwards CL, Pietrobon R, Richardson W, et al. Reliability, validity, and responsiveness of the short form 12-item survey (SF-12) in patients with back pain. *Spine (Phila Pa 1976)*. 2003;28(15):1739-45.
16. Vercoulen JH, Swanink CM, Fennis JF, Galama JM, van der Meer JW, Bleijenberg G. Dimensional assessment of chronic fatigue syndrome. *J Psychosom Res*. 1994;38(5):383-92.
17. Worm-Smeitink M, Gielissen M, Bloot L, van Laarhoven HWM, van Engelen BGM, van Riel P, et al. The assessment of fatigue: Psychometric qualities and norms for the Checklist individual strength. *J Psychosom Res*. 2017;98:40-6.
18. Ponds R VBM, Jolles J. De Cognitive Failure Questionnaire als maat voor subjectief cognitief functioneren. *Tijdschrift voor Neuropsychologie*. 2006(2):37-45.
19. Aaronson NK, Muller M, Cohen PD, Essink-Bot ML, Fekkes M, Sanderman R, et al. Translation, validation, and norming of the Dutch language version of the SF-36 Health Survey in community and chronic disease populations. *J Clin Epidemiol*. 1998;51(11):1055-68.
20. Williams N. The MRC breathlessness scale. *Occup Med (Lond)*. 2017;67(6):496-7.

21. Menges D, Ballouz T, Anagnostopoulos A, Aschmann HE, Domenghino A, Fehr JS, et al. Burden of post-COVID-19 syndrome and implications for healthcare service planning: A population-based cohort study. *PLoS One*. 2021;16(7):e0254523.
22. Broadbent E, Petrie KJ, Main J, Weinman J. The brief illness perception questionnaire. *J Psychosom Res*. 2006;60(6):631-7.
23. Zigmond AS, Snaith RP. The hospital anxiety and depression scale. *Acta Psychiatr Scand*. 1983;67(6):361-70.
24. Morroy G, Peters JB, van Nieuwenhof M, Bor HH, Hautvast JL, van der Hoek W, et al. The health status of Q-fever patients after long-term follow-up. *BMC Infect Dis*. 2011;11:97.
25. Peters JB, Daudey L, Heijdra YF, Molema J, Dekhuijzen PN, Vercoulen JH. Development of a battery of instruments for detailed measurement of health status in patients with COPD in routine care: the Nijmegen Clinical Screening Instrument. *Qual Life Res*. 2009;18(7):901-12.
26. Hakkaart-van Roijen L vdLN, Bouwmans C, Kanters T, Tan S. Costing manual: Methodology of costing research and reference prices for economic evaluations in healthcare. Diemen, the Netherlands 2015.
27. van Muilekom MM, Luijten MAJ, van Oers HA, Conijn T, Maurice-Stam H, van Goudoever JB, et al. Paediatric patients report lower health-related quality of life in daily clinical practice compared to new normative PedsQL(TM) data. *Acta Paediatr*. 2021;110(7):2267-79.
28. Varni JW, Beaujean AA, Limbers CA. Factorial invariance of pediatric patient self-reported fatigue across age and gender: a multigroup confirmatory factor analysis approach utilizing the PedsQL™ Multidimensional Fatigue Scale. *Qual Life Res*. 2013;22(9):2581-94.
29. Gordijn M, Cremers EM, Kaspers GJ, Gemke RJ. Fatigue in children: reliability and validity of the Dutch PedsQL™ Multidimensional Fatigue Scale. *Qual Life Res*. 2011;20(7):1103-8.
30. Huskisson EC. MEASUREMENT OF PAIN. *The Lancet*. 1974;304(7889):1127-31.
31. Wille N, Badia X, Bonsel G, Burström K, Cavrini G, Devlin N, et al. Development of the EQ-5D-Y: a child-friendly version of the EQ-5D. *Quality of Life Research*. 2010;19(6):875-86.
32. Yeatts KB, Stucky B, Thissen D, Irwin D, Varni JW, DeWitt EM, et al. Construction of the Pediatric Asthma Impact Scale (PAIS) for the Patient-Reported Outcomes Measurement Information System (PROMIS). *J Asthma*. 2010;47(3):295-302.
33. Irwin DE, Stucky B, Langer MM, Thissen D, Dewitt EM, Lai J-S, et al. An item response analysis of the pediatric PROMIS anxiety and depressive symptoms scales. *Quality of life research : an international journal of quality of life aspects of treatment, care and rehabilitation*. 2010;19(4):595-607.
34. Muris P, Meesters C, van den Berg F. The Strengths and Difficulties Questionnaire (SDQ). *European Child & Adolescent Psychiatry*. 2003;12(1):1-8.
35. van der Laan MJ, Polley EC, Hubbard AE. Super learner. *Stat Appl Genet Mol Biol*. 2007;6:Article25.
36. James G WD, Hastie T, Tibshirani R. *An Introduction to Statistical Learning : with Applications in R*. New York Springer; 2013.
37. Huang C, Huang L, Wang Y, Li X, Ren L, Gu X, et al. 6-month consequences of COVID-19 in patients discharged from hospital: a cohort study. *Lancet*. 2021;397(10270):220-32.
38. Mittal J, Ghosh A, Bhatt SP, Anoop S, Ansari IA, Misra A. High prevalence of post COVID-19 fatigue in patients with type 2 diabetes: A case-control study. *Diabetes Metab Syndr*. 2021;15(6):102302.
39. Khunti K, Davies MJ, Kosiborod MN, Nauck MA. Long COVID - metabolic risk factors and novel therapeutic management. *Nat Rev Endocrinol*. 2021;17(7):379-80.
40. Blomberg B, Mohn KG, Brokstad KA, Zhou F, Linchausen DW, Hansen BA, et al. Long COVID in a prospective cohort of home-isolated patients. *Nat Med*. 2021;27(9):1607-13.
41. Cortinovis M, Perico N, Remuzzi G. Long-term follow-up of recovered patients with COVID-19. *Lancet*. 2021;397(10270):173-5.

- 1
- 2
- 3
- 4 42. Sandmann F, Tessier E, Lacy J, Kall M, Van Leeuwen E, Charlett A, et al. Long-term health-related
- 5 quality of life in non-hospitalised COVID-19 cases with confirmed SARS-CoV-2 infection in
- 6 England: Longitudinal analysis and cross-sectional comparison with controls. medRxiv.
- 7 2021:2021.10.22.21264701.
- 8
- 9
- 10
- 11
- 12
- 13
- 14
- 15
- 16
- 17
- 18
- 19
- 20
- 21
- 22
- 23
- 24
- 25
- 26
- 27
- 28
- 29
- 30
- 31
- 32
- 33
- 34
- 35
- 36
- 37
- 38
- 39
- 40
- 41
- 42
- 43
- 44
- 45
- 46
- 47
- 48
- 49
- 50
- 51
- 52
- 53
- 54
- 55
- 56
- 57
- 58
- 59
- 60

For peer review only

Figure 1: Recruitment of participants in the LongCOVID-study

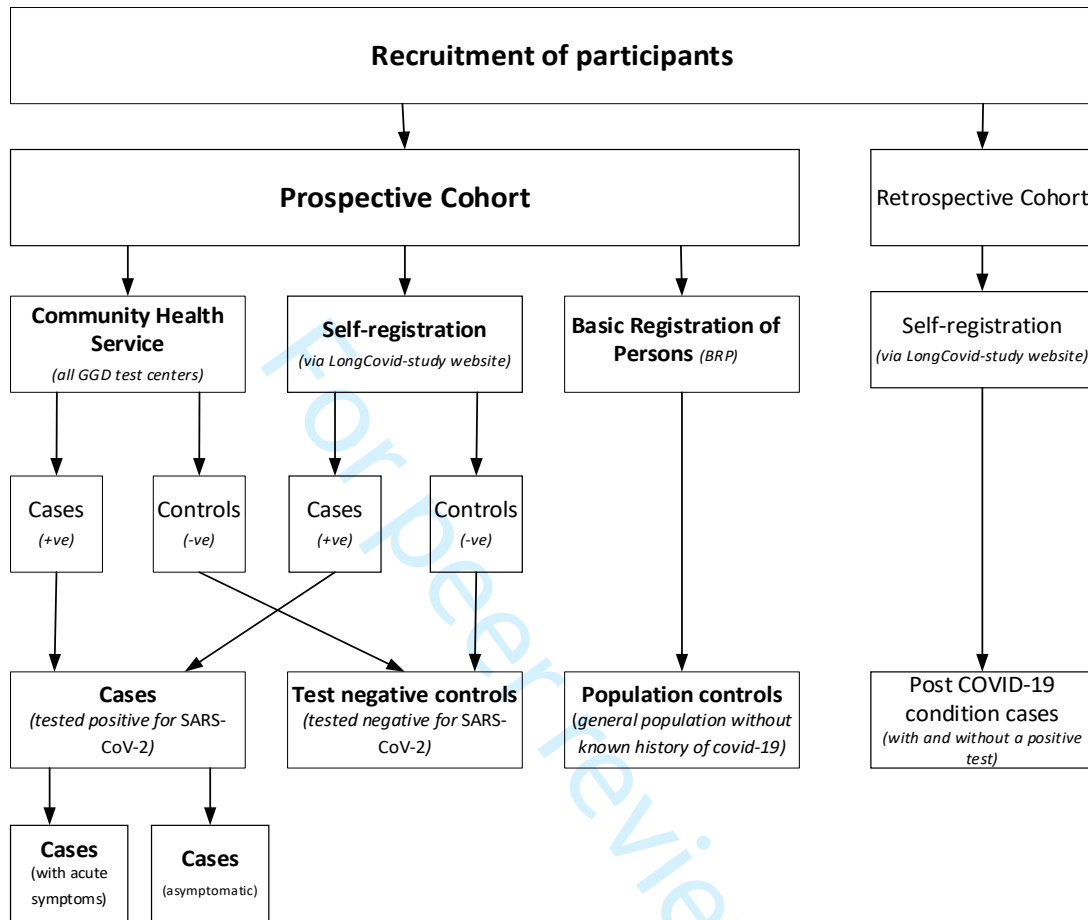

## STROBE Statement—checklist of items that should be included in reports of observational studies

|                              | Item No. | Recommendation                                                                                                                                                                                                                                                                                                                                                                                                                                                         | Page No. | Relevant text from manuscript                                                                                                          |
|------------------------------|----------|------------------------------------------------------------------------------------------------------------------------------------------------------------------------------------------------------------------------------------------------------------------------------------------------------------------------------------------------------------------------------------------------------------------------------------------------------------------------|----------|----------------------------------------------------------------------------------------------------------------------------------------|
| <b>Title and abstract</b>    | 1        | (a) Indicate the study's design with a commonly used term in the title or the abstract                                                                                                                                                                                                                                                                                                                                                                                 | 1        | Observational cohort                                                                                                                   |
|                              |          | (b) Provide in the abstract an informative and balanced summary of what was done and what was found                                                                                                                                                                                                                                                                                                                                                                    | 2        | Protocol for an observation cohort study, hence details of what will be done are provided in the abstract as well as in the manuscript |
| <b>Introduction</b>          |          |                                                                                                                                                                                                                                                                                                                                                                                                                                                                        |          |                                                                                                                                        |
| Background/rationale         | 2        | Explain the scientific background and rationale for the investigation being reported                                                                                                                                                                                                                                                                                                                                                                                   | 3-4      |                                                                                                                                        |
| Objectives                   | 3        | State specific objectives, including any prespecified hypotheses                                                                                                                                                                                                                                                                                                                                                                                                       | 4        |                                                                                                                                        |
| <b>Methods</b>               |          |                                                                                                                                                                                                                                                                                                                                                                                                                                                                        |          |                                                                                                                                        |
| Study design                 | 4        | Present key elements of study design early in the paper                                                                                                                                                                                                                                                                                                                                                                                                                | 4        |                                                                                                                                        |
| Setting                      | 5        | Describe the setting, locations, and relevant dates, including periods of recruitment, exposure, follow-up, and data collection                                                                                                                                                                                                                                                                                                                                        | 4-5      |                                                                                                                                        |
| Participants                 | 6        | (a) <i>Cohort study</i> —Give the eligibility criteria, and the sources and methods of selection of participants. Describe methods of follow-up<br><i>Case-control study</i> —Give the eligibility criteria, and the sources and methods of case ascertainment and control selection. Give the rationale for the choice of cases and controls<br><i>Cross-sectional study</i> —Give the eligibility criteria, and the sources and methods of selection of participants | 4-6      |                                                                                                                                        |
|                              |          | (b) <i>Cohort study</i> —For matched studies, give matching criteria and number of exposed and unexposed<br><i>Case-control study</i> —For matched studies, give matching criteria and the number of controls per case                                                                                                                                                                                                                                                 |          |                                                                                                                                        |
| Variables                    | 7        | Clearly define all outcomes, exposures, predictors, potential confounders, and effect modifiers. Give diagnostic criteria, if applicable                                                                                                                                                                                                                                                                                                                               | 5-9      |                                                                                                                                        |
| Data sources/<br>measurement | 8*       | For each variable of interest, give sources of data and details of methods of assessment (measurement). Describe comparability of assessment methods if there is more than one group                                                                                                                                                                                                                                                                                   | 5-9      |                                                                                                                                        |

---

|    |            |    |                                                           |
|----|------------|----|-----------------------------------------------------------|
| 1  |            |    |                                                           |
| 2  | Bias       | 9  | Describe any efforts to address potential sources of bias |
| 3  |            |    |                                                           |
| 4  |            |    |                                                           |
| 5  |            |    |                                                           |
| 6  |            |    |                                                           |
| 7  |            |    |                                                           |
| 8  |            |    |                                                           |
| 9  |            |    |                                                           |
| 10 |            |    |                                                           |
| 11 |            |    |                                                           |
| 12 | Study size | 10 | Explain how the study size was arrived at                 |
| 13 |            |    |                                                           |
| 14 |            |    |                                                           |
| 15 |            |    |                                                           |
| 16 |            |    |                                                           |
| 17 |            |    |                                                           |
| 18 |            |    |                                                           |
| 19 |            |    |                                                           |
| 20 |            |    |                                                           |
| 21 |            |    |                                                           |
| 22 |            |    |                                                           |
| 23 |            |    |                                                           |
| 24 |            |    |                                                           |
| 25 |            |    |                                                           |
| 26 |            |    |                                                           |
| 27 |            |    |                                                           |
| 28 |            |    |                                                           |
| 29 |            |    |                                                           |
| 30 |            |    |                                                           |
| 31 |            |    |                                                           |
| 32 |            |    |                                                           |
| 33 |            |    |                                                           |
| 34 |            |    |                                                           |
| 35 |            |    |                                                           |
| 36 |            |    |                                                           |
| 37 |            |    |                                                           |
| 38 |            |    |                                                           |
| 39 |            |    |                                                           |
| 40 |            |    |                                                           |
| 41 |            |    |                                                           |
| 42 |            |    |                                                           |
| 43 |            |    |                                                           |
| 44 |            |    |                                                           |
| 45 |            |    |                                                           |
| 46 |            |    |                                                           |

---

Continued on next page

---

The study makes use of two controls groups (negative controls and population controls) in an attempt to minimize selection bias. Questionnaires are completed every 3 months in an attempt to minimise recall bias.

Our study is an ongoing prospective cohort study

|                        |     |                                                                                                                                                                                                                                                                                                           |                                 |
|------------------------|-----|-----------------------------------------------------------------------------------------------------------------------------------------------------------------------------------------------------------------------------------------------------------------------------------------------------------|---------------------------------|
| Quantitative variables | 11  | Explain how quantitative variables were handled in the analyses. If applicable, describe which groupings were chosen and why                                                                                                                                                                              | 10-11                           |
| Statistical methods    | 12  | (a) Describe all statistical methods, including those used to control for confounding                                                                                                                                                                                                                     | 10-11                           |
|                        |     | (b) Describe any methods used to examine subgroups and interactions                                                                                                                                                                                                                                       | 10-11                           |
|                        |     | (c) Explain how missing data were addressed                                                                                                                                                                                                                                                               | 11                              |
|                        |     | (d) <i>Cohort study</i> —If applicable, explain how loss to follow-up was addressed<br><i>Case-control study</i> —If applicable, explain how matching of cases and controls was addressed<br><i>Cross-sectional study</i> —If applicable, describe analytical methods taking account of sampling strategy |                                 |
|                        |     | (e) Describe any sensitivity analyses                                                                                                                                                                                                                                                                     | 11                              |
| <b>Results</b>         |     |                                                                                                                                                                                                                                                                                                           |                                 |
| Participants           | 13* | (a) Report numbers of individuals at each stage of study—eg numbers potentially eligible, examined for eligibility, confirmed eligible, included in the study, completing follow-up, and analysed                                                                                                         | Protocol paper, no results yet. |
|                        |     | (b) Give reasons for non-participation at each stage                                                                                                                                                                                                                                                      | Protocol paper, no results yet  |
|                        |     | (c) Consider use of a flow diagram                                                                                                                                                                                                                                                                        |                                 |
| Descriptive data       | 14* | (a) Give characteristics of study participants (eg demographic, clinical, social) and information on exposures and potential confounders                                                                                                                                                                  | Protocol paper, no results yet  |
|                        |     | (b) Indicate number of participants with missing data for each variable of interest                                                                                                                                                                                                                       | Protocol paper, no results yet  |
|                        |     | (c) <i>Cohort study</i> —Summarise follow-up time (eg, average and total amount)                                                                                                                                                                                                                          | Protocol paper, no results yet  |
| Outcome data           | 15* | <i>Cohort study</i> —Report numbers of outcome events or summary measures over time                                                                                                                                                                                                                       | Protocol paper, no results yet  |
|                        |     | <i>Case-control study</i> —Report numbers in each exposure category, or summary measures of exposure                                                                                                                                                                                                      |                                 |
|                        |     | <i>Cross-sectional study</i> —Report numbers of outcome events or summary measures                                                                                                                                                                                                                        |                                 |
| Main results           | 16  | (a) Give unadjusted estimates and, if applicable, confounder-adjusted estimates and their precision (eg, 95% confidence interval). Make clear which confounders were adjusted for and why they were included                                                                                              | Protocol paper, no results yet  |
|                        |     | (b) Report category boundaries when continuous variables were categorized                                                                                                                                                                                                                                 | Protocol paper, no results yet  |
|                        |     | (c) If relevant, consider translating estimates of relative risk into absolute risk for a meaningful time period                                                                                                                                                                                          | Protocol paper, no results yet  |

Continued on next page

|                          |    |                                                                                                                                                                            |                                |
|--------------------------|----|----------------------------------------------------------------------------------------------------------------------------------------------------------------------------|--------------------------------|
| Other analyses           | 17 | Report other analyses done—eg analyses of subgroups and interactions, and sensitivity analyses                                                                             | Protocol paper, no results yet |
| <b>Discussion</b>        |    |                                                                                                                                                                            |                                |
| Key results              | 18 | Summarise key results with reference to study objectives                                                                                                                   | Protocol paper, no results yet |
| Limitations              | 19 | Discuss limitations of the study, taking into account sources of potential bias or imprecision. Discuss both direction and magnitude of any potential bias                 | 12                             |
| Interpretation           | 20 | Give a cautious overall interpretation of results considering objectives, limitations, multiplicity of analyses, results from similar studies, and other relevant evidence | Protocol paper, no results yet |
| Generalisability         | 21 | Discuss the generalisability (external validity) of the study results                                                                                                      | Protocol paper, no results yet |
| <b>Other information</b> |    |                                                                                                                                                                            |                                |
| Funding                  | 22 | Give the source of funding and the role of the funders for the present study and, if applicable, for the original study on which the present article is based              | 13                             |

\*Give information separately for cases and controls in case-control studies and, if applicable, for exposed and unexposed groups in cohort and cross-sectional studies.

**Note:** An Explanation and Elaboration article discusses each checklist item and gives methodological background and published examples of transparent reporting. The STROBE checklist is best used in conjunction with this article (freely available on the Web sites of PLoS Medicine at <http://www.plosmedicine.org/>, Annals of Internal Medicine at <http://www.annals.org/>, and Epidemiology at <http://www.epidem.com/>). Information on the STROBE Initiative is available at [www.strobe-statement.org](http://www.strobe-statement.org).



# BMJ Open

## Prevalence and determinants of persistent symptoms after infection with SARS-CoV-2: protocol for an observational cohort study (LongCOVID-study)

|                                 |                                                                                                                                                                                                                                                                                                                                                                        |
|---------------------------------|------------------------------------------------------------------------------------------------------------------------------------------------------------------------------------------------------------------------------------------------------------------------------------------------------------------------------------------------------------------------|
| Journal:                        | <i>BMJ Open</i>                                                                                                                                                                                                                                                                                                                                                        |
| Manuscript ID                   | bmjopen-2022-062439.R1                                                                                                                                                                                                                                                                                                                                                 |
| Article Type:                   | Protocol                                                                                                                                                                                                                                                                                                                                                               |
| Date Submitted by the Author:   | 02-Jun-2022                                                                                                                                                                                                                                                                                                                                                            |
| Complete List of Authors:       | Mutubuki, Elizabeth; RIVM<br>van der Maaden, Tessa; RIVM<br>Leung, Ka Yin; RIVM<br>Wong, Albert; RIVM<br>Tulen, Anna D.; RIVM<br>de Bruijn, Siméon; RIVM<br>Haverman, Lotte; Amsterdam Universitair Medische Centra<br>Knoop, H.; Amsterdam UMC Locatie VUmc, Medical Psychology<br>Franz, Eelco; RIVM<br>van Hoek, Albert Jan; RIVM,<br>van den Wijngaard, Cees; RIVM |
| <b>Primary Subject Heading</b>: | Infectious diseases                                                                                                                                                                                                                                                                                                                                                    |
| Secondary Subject Heading:      | Epidemiology, Public health                                                                                                                                                                                                                                                                                                                                            |
| Keywords:                       | COVID-19, EPIDEMIOLOGY, HEALTH ECONOMICS                                                                                                                                                                                                                                                                                                                               |
|                                 |                                                                                                                                                                                                                                                                                                                                                                        |

SCHOLARONE™  
Manuscripts

1  
2  
3  
4 1 Prevalence and determinants of persistent symptoms after  
5 2 infection with SARS-CoV-2: protocol for an observational  
6 3 cohort study (LongCOVID-study)  
7  
8  
9  
10 4

11 5 Elizabeth N. Mutubuki<sup>1</sup>, Tessa van der Maaden<sup>1</sup>, Ka Yin Leung<sup>1</sup>, Albert Wong<sup>1</sup>,  
12 6 Anna D. Tulen<sup>1</sup>, Siméon de Bruijn<sup>1</sup>, Lotte Haverman<sup>2</sup>, Hans Knoop<sup>3</sup>, Eelco  
13 7 Franz<sup>1</sup>, Albert Jan van Hoek<sup>1</sup>, Cees C. van den Wijngaard<sup>1</sup>  
14  
15  
16  
17 8

18  
19 9 <sup>1</sup>National Institute for Public Health and the Environment (RIVM), Center for Infectious Disease  
20 10 Control, Bilthoven, the Netherlands

21  
22 11 <sup>2</sup>Emma Children's Hospital, Amsterdam UMC, University of Amsterdam, Child and Adolescent  
23 12 Psychiatry & Psychosocial Care, Amsterdam Reproduction and Development, Amsterdam Public  
24 13 Health, Amsterdam, the Netherlands.

25  
26 14 <sup>3</sup>Department of Medical Psychology, Amsterdam University Medical Center, University of  
27 15 Amsterdam, Amsterdam Public Health Research Institute, Amsterdam, the Netherlands.

28  
29 16 **Correspondence to:** Elizabeth N Mutubuki

30  
31 17 Email address: [elizabeth.mutubuki@rivm.nl](mailto:elizabeth.mutubuki@rivm.nl)  
32  
33 18

34  
35 19 **Abstract**

36  
37 20 **Introduction:** A substantial proportion of individuals infected with severe acute respiratory  
38 21 syndrome coronavirus-2 (SARS-CoV-2), report persisting symptoms weeks and months following  
39 22 acute infection. Estimates on prevalence vary due to differences in study designs, populations,  
40 23 heterogeneity of symptoms and the way symptoms are measured. Common symptoms include  
41 24 fatigue, cognitive impairment and dyspnea. However, knowledge regarding the nature and risk  
42 25 factors for developing persisting symptoms is still limited. Hence in this study we aim to determine  
43 26 the prevalence, severity, risk factors and impact on quality of life of persisting symptoms in the first  
44 27 year following acute SARS-CoV-2 infection.

45  
46 28 **Methods and analysis:** The LongCOVID-study is both a prospective and retrospective cohort study  
47 29 being conducted in the Netherlands, with a one year follow up. Participants aged 5 years and above,  
48 30 with self-reported positive or negative tests for SARS-CoV-2 will be included in the study. The  
49 31 primary outcome is the prevalence and severity of persistent symptoms in participants that tested  
50 32 positive for SARS-CoV-2 compared to controls. Symptom severity will be assessed for fatigue  
51 33 (Checklist Individual Strength (CIS subscale fatigue severity)), pain (Rand-36/SF-36 subscale bodily  
52  
53  
54  
55  
56  
57  
58  
59  
60

1  
2  
3 1 pain), dyspnea (Medical Research Council (mMRC)) and cognitive impairment (Cognitive Failure  
4 Questionnaire (CFQ)). Secondary outcomes include effect of vaccination prior to infection on  
5  
6 2 persistent symptoms, loss of health-related quality of life (HRQoL) and risk factors for persisting  
7  
8 3 symptoms following infection with SARS-CoV-2.  
9 4

10 5 **Ethics and dissemination:** The Utrecht Medical Ethics Committee (METC) declared in February 2021  
11 that the Medical Research Involving Human Subjects Act (WMO) does not apply to this study (METC  
12 protocol number 21-124/C). Informed consent is required prior to participation in the study. Results  
13  
14 6 of this study will be submitted for publication in a peer-reviewed journal.  
15  
16 7  
17 8

18 9  
19  
20 10 **Keywords:** SARS-CoV-2, post COVID-19 condition, LongCovid, prevalence, HRQoL, risk factors.  
21  
22 11

## 23 12 **Strengths and limitations of this study**

- 24 13 • The prospective design allows for tracking of progression of symptoms, and hence  
25 identification of persisting symptoms.
- 26 14 • Having control groups enables identification of symptoms in COVID-19 patients, with  
27 prevalence higher than the background prevalence, and prevalence among individuals that  
28 likely have another respiratory infection.
- 29 15 • Recruitment of participants from community health testing improves representation of the  
30 general population.
- 31 16 • Like many other studies, a limitation of this study is the inability to determine for individuals  
32 whether self-reported symptoms are not a result of other illnesses (i.e. background  
33 prevalence).
- 34 17 • No serological data is available for cases and controls in order to investigate infections that  
35 may go unnoticed.

## 36 18 **Introduction**

37 19 During the first months of the pandemic, epidemiological research focused primarily on the spread  
38 of Severe Acute Respiratory Syndrome Coronavirus-2 (SARS-CoV-2) and on treatment of those with  
39 severe or fatal illness (1). The effects of SARS-CoV-2 infection vary from asymptomatic infection,  
40 through to critical and chronic disease (2). Although most individuals infected with SARS-CoV-2 fully  
41  
42  
43  
44  
45  
46  
47  
48  
49  
50  
51  
52  
53  
54  
55  
56  
57  
58  
59  
60

1  
2  
3 1 recover, there is a growing body of evidence suggesting a substantial number of individuals remain  
4  
5 2 with long-term complications or persisting symptoms (3-5).

6  
7 3 COVID-19 varies in clinical presentation, disease severity and recovery time (6). A delay in recovery  
8  
9 4 whereby individuals fail to return to their normal daily routines, and still report lasting effects of the  
10  
11 5 infection long after the expected period of recovery, has been termed; "LongCovid" (7), "long-  
12  
13 6 haulers" (8) and "post COVID-19 condition" (PCC) (9). The term PCC will be used in the remainder of  
14  
15 7 this article. PCC is reported to occur in individuals that have a history of probable or confirmed SARS-  
16  
17 8 CoV-2 infection, usually 3 months from the onset of COVID-19, with symptoms lasting at least 2  
18  
19 9 months that cannot be explained by an alternative diagnosis (9). Symptoms may persist from initial  
20  
21 10 infection, be of new onset following initial recovery from an acute COVID-19 episode or may also  
22  
23 11 fluctuate or relapse over time (10)

24  
25 12 In December 2021, more than 263 million confirmed COVID-19 cases had been reported worldwide,  
26  
27 13 and of those, an estimated 10-20% are reported to experience persisting symptoms for weeks or  
28  
29 14 months following acute SARS-CoV2 infection (10). However, higher incidence rates of persisting  
30  
31 15 symptoms have been reported, for example through self-surveys of patient from LongCovid peer  
32  
33 16 support groups (11) as well as in hospitalized patients (12). Variations in the reported incidence and  
34  
35 17 prevalence rates of post COVID-19 condition can be attributed to; the complexity of the syndrome,  
36  
37 18 differences in population groups, heterogeneity in clinical presentation of symptoms, little  
38  
39 19 knowledge regarding the natural history (13) and in the way symptoms are measured.

40  
41 20 A good overview of the nature of persisting symptoms following an acute infection with SARS-CoV-2,  
42  
43 21 can enable better diagnosis, management and may reduce negative consequences on health-related  
44  
45 22 quality of life (HRQoL) (13). Hence in this study we aim to determine the prevalence and severity of  
46  
47 23 persisting symptoms in the first year of infection, in individuals infected by SARS-CoV-2 compared to  
48  
49 24 individuals that were not infected. In addition, risk factors for developing post COVID-19 condition  
50  
51 25 and its impact on HRQoL will be analyzed.

## 52 26 **Methods and analysis**

### 53 27 **Study aim and design**

54  
55 28 The LongCOVID-study is an observational cohort study consisting of a prospective, and a  
56  
57 29 retrospective cohort with both data collected in the phase of acute illness and during one year of  
58  
59 30 follow up. The study aims to determine the prevalence, severity, health impact and risk factors  
60  
31 associated with persistent symptoms following a SARS-CoV-2 infection, in cases compared to  
32  
33 population controls and test-negative controls. The study is carried out by the Dutch National  
Institute for Public Health and the Environment (RIVM), Bilthoven, the Netherlands. Recruitment of

1 participants in the study started in May 2021 and is ongoing. Currently there is no set timeline for  
2 the completion of recruitment. Participants will be followed up at 3, 6, 9 and 12 months. Follow-up  
3 questionnaires can be completed within six weeks from the invitation sent at 3, 6, 9 and 12 months.  
4 Analyses will be performed separately for the prospective and retrospective cohorts.

## 5 **Study population**

6 Both the prospective and retrospective cohorts include children (ages 5-17) and adults (18 years and  
7 above).

## 8 **Inclusion and exclusion criteria**

### 9 *Prospective cohort study*

10 Participants with a positive SARS-CoV-2 infection test result on an antigen or polymerase chain  
11 reaction (PCR) test for acute infection, are included in the study as cases, if they complete the  
12 baseline questionnaire within 7 days of testing positive regardless of whether or not they had  
13 symptoms related to SARS-CoV-2 infection. Participants that test negative to SARS-CoV-2 infection  
14 and complete their baseline questionnaire within 7 days of testing negative, are included in the  
15 study as test-negative controls. A second group of controls, population controls, consists of  
16 randomly selected participants from the Basic Registration of Persons (BRP) without a positive test  
17 for SARS-CoV-2 infection or known history of probable infections.

### 18 *Retrospective cohort study*

19 Participants presenting with self-reported persisting symptoms associated with SARS-CoV-2 infection  
20 with or without having had a positive test result are included in the retrospective cohort study as  
21 self-reported post COVID-19 condition cases.

## 22 **Recruitment of participants**

23 Figure 1 shows the flow diagram of participant recruitment in the LongCOVID-study.

## 24 **FIGURE TITLE**

### 25 **Figure 1: Recruitment of participants in the LongCOVID-study (14)**

26 Participants are recruited through the following three ways:

#### 27 *Via Community Health Testing Services*

28 Individuals testing positive and negative to COVID-19 at one of the community health testing  
29 services (GGDs) in the Netherlands, are invited to participate in the LongCOVID-study. Registration  
30 to participate is via the LongCOVID-study website.

1  
2  
3 1 *Basic Registration of Persons (BRP)*  
4

5 2 Population controls including pediatric controls are *frequency matched to the distribution of age and*  
6  
7 3 *sex of the cases* randomly selected from the BRP in the Netherlands and invited by letter to  
8  
9 4 participate in the study.

10  
11 5 *Self-registered participants*  
12

13 6 Individuals interested in participating in the LongCovid-study can also self-register through the study  
14  
15 7 website ([longcovid.rivm.nl](http://longcovid.rivm.nl)). Test-negative controls, cases and post COVID-19 condition cases can be  
16  
17 8 included in the study this way.

18  
19 9 **Patient and public involvement**  
20

21 10 Questionnaires will be tested on a lay public and adjusted according to the feedback given. There  
22  
23 11 will be no further patient or public involvement.

24 12 **Measurements in adults**  
25

26 13 Table 1 shows different measurement moments when data are collected using questionnaires. At  
27  
28 14 baseline, data on demographical characteristics such as gender, education level and employment are  
29  
30 15 collected. Data on comorbidities is reported at baseline and at 12 months. Information regarding  
31  
32 16 testing for SARS-CoV-2, COVID-19 related complaints and vaccination data is collected at baseline  
33  
34 17 and at 3, 6, 9 and 12 months.

35 18 *Health related quality of life (EuroQoL five dimensional instrument(EQ-5D-5L) and Rand-12/SF-12)*  
36

37 19 HRQoL regarding long-term symptoms is assessed using the Rand-12/SF-12 in cases and controls. For  
38  
39 20 HRQoL regarding the acute phase of disease, additional weekly measurements using the EQ-5D-5L  
40  
41 21 are carried out in individuals presenting with acute symptoms in the first 8 weeks following a  
42  
43 22 positive COVID-19 test. The EQ-5D-5L questionnaire consists of five dimensions of health (mobility,  
44  
45 23 self-care, usual activities, pain/discomfort, and anxiety/ depression), with five levels of response and  
46  
47 24 a visual analogue scale (EQ VAS). The EQ-5D-5L scores will be converted into utility scores using the  
48  
49 25 Dutch tariff (15), ranging from 0 (death) to 1 (optimal health).

50 26 The Rand-12/SF-12, a shortened version of the Rand-36/SF-36 HRQoL questionnaire consists  
51  
52 27 of 12 questions from the following 8 domains: physical functioning, physical role limitations,  
53  
54 28 emotional role limitations, social functioning, physical pain, general mental health, vitality and  
55  
56 29 general health perception. The 8 domains can be summarized into a physical and mental health  
57  
58 30 domain (16). Health scores will be converted into utility scores using the SF-6D (Short-Form Six-  
59  
60 31 Dimension). Quality adjusted life years (QALYs) will be calculated by multiplying the utility scores by  
32  
the time a patient spends in a given health state.

1  
2  
3 1 *Fatigue (Checklist Individual Strength [CIS])*  
4

5 2 Fatigue severity is assessed using the subscale fatigue severity of the CIS. The CIS subscale fatigue is  
6 3 a 8-item fatigue questionnaire (17). Each item is scored on a 7-point Likert scale. Scores range from 8  
7 4 to 56, and scores of 35 and higher indicate severe fatigue (18).

10  
11 5 *Cognitive function (Cognitive Failure Questionnaire [CFQ])*  
12

13 6 Cognitive function is assessed using the CFQ. The CFQ consists of 25 items that are scored on a 5-  
14 7 point scale ranging from very often to never. Total scores range from 0 to a 100, with higher scores  
15 8 indicating more cognitive impairment (19). A score of 44 or higher indicated clinically significant  
16 9 complaints on cognitive function.

20  
21 10 *Pain (bodily pain subscale of the Rand-36/SF-36 Health Status Inventory [Rand-36])*  
22

23 11 The bodily pain subscale of the Rand-36 Health Status Inventory (Rand-36) is used to assess pain  
24 12 severity. The Rand-36 scores range from 0 to 100, higher scores indicate better health status.  
25 13 Significant impairment due to pain is reflected by a score of 55 or lower, based on Dutch norm  
26 14 scores (20).

30  
31 15 *Dyspnea (Medical Research Council (dyspnea) [mMRC])*  
32

33 16 Dyspnea is assessed using the modified mMRC (dyspnea). The mMRC scale ranges from grade 0 to 4.  
34 17 Grade 0- breathless with strenuous exercise; Grade 1- short of breath when hurrying on level ground  
35 18 or walking up a slight hill; Grade-2 walks slower on level ground because of breathlessness or stops  
36 19 for a breath when walking at own pace; Grade 3- stops for breath after walking about 100 yards or  
37 20 after a few minutes on level ground and Grade 4- am too breathless to leave the house or I am  
38 21 breathless when dressing (21). A score of 1 or higher reflects significant impairment due to dyspnea  
39 22 (22).

44  
45 23 *Illness and related beliefs (The Brief Illness Perception Questionnaire [Brief IPQ])*  
46

47 24 The Brief Illness Perception Questionnaire (Brief IPQ /IPQ-K) is an eight-item scale to assess the  
48 25 cognitive and emotional representations of illness including consequences, timeline, personal  
49 26 control, treatment control, identity, coherence, concern, emotional response and causes (23). Item  
50 27 scores increases, represent linear increases in the dimension measured. The Brief IPQ is reported to  
51 28 have good test-retest reliability (23).

55  
56 29 *Anxiety (Hospital Anxiety and Depression Scale [HADS])*  
57  
58  
59  
60

1  
2  
3 1 HADS is a 14 item self-report questionnaire designed to measure anxious and depressive states in  
4 patients with two subscales (24). The sum score per subscale ranges from 0 to 21. Scores between 0-  
5 2  
6 7 indicate no anxiety or depression, 8-10 mild cases, 11-15 moderate cases and 16 or above severe  
7 3  
8 4 cases (Snaith 1994).

9  
10 5 *Dyspnea (The Nijmegen Clinical Screening Instrument [NCSI])*

11  
12  
13 6 The NCSI has four main domains (25), and 8 subdomains (26). Each subdomain is expressed as a  
14 7  
15 7 single score on its own scale, with higher NCSI scores indicate more problems (25). In the study the  
16 8  
17 8 subdomain dyspnea will be used.

18  
19 9 *Absenteeism (iMTA Productivity Cost Questionnaire [iPCQ])*

20  
21 10 Participants will be asked to report the number of days that they have been absent from work due  
22 11  
23 11 to illness. Absenteeism will be measured using the iPCQ.

24  
25 12 *Unpaid Productivity losses and informal care*

26  
27 13 Unpaid productivity losses from work, studies, voluntary work as well as informal care will be valued  
28 14  
29 14 using the Dutch shadow price relevant for that year.

30  
31 15 *Acute phase*

32  
33 16 Data on HRQoL and acute symptoms will be collected weekly in the first 8 weeks following infection  
34 17  
35 17 in the prospective cohort. Data collection will stop when the symptoms stop or end at 8 weeks  
36 18  
37 18 following baseline measurements.

38  
39 19 **Measurements in children**

40  
41 20 Below are age-specific scales that will be used in children (aged 5-17 years). These differ from some  
42 21  
43 21 of the above described scales for adults (Table 1).

44  
45 22 *Physical function (Pediatric Quality of Life Inventory [PedsQL])*

46  
47  
48 23 The PedsQL is a HRQoL measure consisting of 4 subscales (physical functioning, emotional  
49 24  
50 24 functioning, social functioning and school functioning) which can be computed **into** two summary  
51 25  
52 25 scores (psychosocial and physical health summary scores). Dutch norms are available which allow  
53 26  
54 26 comparison with the general population (27). A parent proxy of the PedsQL will be used for children  
55 27  
56 27 aged 5-7 years.

57 28 *Fatigue (Pediatric Quality of Life Inventory Fatigue Scale [PedsQL fatigue]).*



1  
2  
3 1 Fatigue severity in children will be assessed with the PedsQL fatigue. This 18-item PedsQL fatigue  
4 scale comprises the general fatigue scale (6 items), sleep/rest fatigue scale (6 items), and cognitive  
5 2 fatigue scale (6 items) and is a reliable and valid instrument to measure fatigue in children (28).  
6 3  
7 4 Dutch norm scores are available (29). A parent proxy will be used for children aged 5-7 years.

8  
9  
10  
11 5 *Illness and related beliefs (The Brief Illness Perception Questionnaire [Brief IPQ])*

12  
13 6 The Brief IPQ /IPQ-K-parents will be completed by a parent (22), and by the child if they are aged 10  
14 7 or older.

15  
16  
17 8 *Pain Visual analogue scale (VAS)*

18  
19 9 Pain severity will be assessed using VAS (30). Scores range from 0 (no pain) to a 100 ( worst  
20 10 imaginable pain). A parent proxy will be used for children aged 5-7 years.

21  
22  
23 11 *HRQoL (EQ-5D-Y)*

24  
25 12 Weekly measurement moments for up to 8 weeks in children presenting with acute symptoms  
26 13 follow a positive COVID-19 test, will be carried out. The EQ-5D-Y-Proxy1 will be used for children  
27 14 aged 5-7 years, and the EQ-5D-Y will be used for children aged 8-17 years to measure HRQoL. The  
28 15 EQ-5D-Y-Proxy1 and EQ-5D-Y questionnaires consist of five dimensions (mobility, self-care, usual  
29 16 activities, pain/discomfort, and anxiety/ depression), with three levels of response and a visual  
30 17 analogue scale (EQ VAS)(31).

31  
32  
33  
34  
35  
36 18 *Dyspnea (Patient-Reported Outcomes Measurement Information System [PROMIS])*

37  
38  
39 19 Dyspnea will be assessed in children aged 5-7 years using an adjusted PROMIS Asthma impact Short  
40 20 form Proxy and in children 8-17 using an adjusted PROMIS Asthma impact Short form(32).

41  
42  
43 21 *Cognitive function and behaviour (PROMIS and SDQ)*

44  
45 22 Loneliness will be assessed in children aged 5-7 years using the PROMIS short form proxy depressive  
46 23 symptoms and in children 8-17 using the PROMIS short form depressive symptoms, for which norm  
47 24 scores are available which allow comparison with the general population (32, 33). In addition the  
48 25 strengths and difficulties questionnaire (SDQ) will be used as well to assess the level of depressive  
49 26 symptoms, with a proxy for parents in the 5-11 years of age (34).

50  
51  
52  
53  
54 27 **Outcome measures**

55  
56 28 *Primary outcome*

57  
58 29 1. The first primary outcome measure is the prevalence and severity of persistent symptoms in  
59 30 patients that test positive for COVID-19 infection compared to both, test-negative and

1 population controls. Severity of symptoms will be assessed for fatigue, pain, dyspnea, and  
 2 cognitive impairment using standardized questionnaires, with population-based norm cut-  
 3 off scores for clinically significant severity.

4 *Secondary outcomes include:*

- 5 1. Effect of vaccination to SARS-CoV-2 at baseline (i.e. before infection) on the prevalence and  
 6 severity of persistent symptoms after SARS-CoV-2 infection.
- 7 2. Factors that predict post COVID-19 condition following an acute SARS-CoV-2 infection at  
 8 different follow up moments.
- 9 3. Healthcare utilization in the first year following infection with SARS-CoV-2 in cases compared  
 10 to controls (test-negative controls and population controls) will be assessed.
- 11 4. HRQoL in cases will be compared to that of controls (test-negative controls and population  
 12 controls) in the first year following infection. Additionally a comparison will also be made  
 13 between post COVID-19 condition individuals and individuals that test positive for COVID-19  
 14 but do not develop post COVID-19 condition.

16 **Table 1: Measurement timetable**

|                                                                                                                                      | Baseline | Acute symptoms (in weeks) |   |   |   |   |   |   |   | 3 months | 6 months | 9 months | 12 months |
|--------------------------------------------------------------------------------------------------------------------------------------|----------|---------------------------|---|---|---|---|---|---|---|----------|----------|----------|-----------|
|                                                                                                                                      |          | 1                         | 2 | 3 | 4 | 5 | 6 | 7 | 8 |          |          |          |           |
| Informed consent                                                                                                                     | X        |                           |   |   |   |   |   |   |   |          |          |          |           |
| Baseline characteristics                                                                                                             | X        |                           |   |   |   |   |   |   |   |          |          |          |           |
| Vaccination data<br>(status, type, date)                                                                                             | X        |                           |   |   |   |   |   |   |   | X        | X        | X        | X         |
| Health utilization<br>(contact with healthcare<br>providers, medication use)                                                         | X        |                           |   |   |   |   |   |   |   | X        | X        | X        | X         |
| Symptom data                                                                                                                         | X        | X                         | X | X | X | X | X | X | X | X        | X        | X        | X         |
| HRQoL<br>(EQ-5D*/EQ-5D-Y**)                                                                                                          | X*       | X                         | X | X | X | X | X | X | X | X*       | X*       | X*       | X*        |
| Health utilization<br>(contact with healthcare<br>providers, medication use)                                                         | X        |                           |   |   |   |   |   |   |   | X        | X        | X        | X         |
| Co-morbidities                                                                                                                       | X        |                           |   |   |   |   |   |   |   |          |          |          | X         |
| <b>Adults</b>                                                                                                                        |          |                           |   |   |   |   |   |   |   |          |          |          |           |
| HRQoL (Rand-12)                                                                                                                      | X        |                           |   |   |   |   |   |   |   | X        | X        | X        | X         |
| Pain, Physical function and<br>Social function (Rand-<br>36/SF-36 subscales pain,<br>social functioning and<br>physical functioning) | X        |                           |   |   |   |   |   |   |   | X        | X        | X        | X         |
| Cognitive function (CFQ)                                                                                                             | X        |                           |   |   |   |   |   |   |   | X        | X        | X        | X         |
| Fatigue (CIS)                                                                                                                        | X        |                           |   |   |   |   |   |   |   | X        | X        | X        | X         |
| Illness and related beliefs<br>(Brief IPQ)                                                                                           | X        |                           |   |   |   |   |   |   |   | X        | X        |          |           |
| Anxiety and depression<br>(HADS)                                                                                                     | X        |                           |   |   |   |   |   |   |   | X        | X        |          |           |

|                                                                      |   |  |  |  |  |  |  |  |   |   |   |   |
|----------------------------------------------------------------------|---|--|--|--|--|--|--|--|---|---|---|---|
| Dyspnea ( <i>mMRC</i> )                                              | X |  |  |  |  |  |  |  | X | X | X | X |
| Dyspnea ( <i>NCSI</i> )                                              | X |  |  |  |  |  |  |  | X | X | X | X |
| <b>Children</b>                                                      |   |  |  |  |  |  |  |  |   |   |   |   |
| Physical function ( <i>PedsQL subscale physical health</i> )         | X |  |  |  |  |  |  |  | X | X | X | X |
| Fatigue ( <i>PedsQL fatigue</i> )                                    | X |  |  |  |  |  |  |  | X | X | X | X |
| Illness and related beliefs ( <i>Brief IPQ / brief IPQ-parents</i> ) | X |  |  |  |  |  |  |  | X | X |   |   |
| Pain ( <i>VAS</i> )                                                  | X |  |  |  |  |  |  |  | X | X | X | X |
| Dyspnea ( <i>adjusted PROMIS Asthma</i> )                            | X |  |  |  |  |  |  |  | X | X | X | X |
| Depressive symptoms ( <i>PROMIS, SDQ</i> )                           | X |  |  |  |  |  |  |  | X | X | X | X |

\*Measured in adults

\*\*Measured in kids

## Sample size

The study should have sufficient power to determine whether and which long-term symptoms are more common in COVID-19 patients than in controls. Experience from similar studies shows that around 25% of the population experiences long-term symptoms to some extent (reporting a score indicating fatigue/pain/concentration problems for at least 3 months)(35). With 2000 cases and 1000 test-negative controls, a difference of 5% or more between the prevalence of 25% in controls compared to 30% in COVID cases can be detected with a power slightly above 80% (power 82%; alpha: 0.05). However, recruitment will continue even after the participant counts mentioned above are reached.

## Statistical analysis

Baseline characteristics of the participants in all groups will be presented using descriptive statistics mean (standard deviation), median (range), or proportion to assess if there is a balance in the groups regarding distribution of prognostic factors such as age, gender, co-morbidity and education. The analyses of the children will initially be conducted separately from those of the adults.

## Prospective study

### Primary outcome analysis

#### 1. Prevalence and severity of persistent symptoms in COVID-19 patients

Descriptive epidemiological statistical methods will be used to analyze prevalence of persistent symptoms at 3, 6, 9 and 12 months in cases compared to both control groups (test-negative controls and population controls). Persisting symptoms are defined as symptoms in cases with a duration of

1  
2  
3 1 at least 2 months. Such symptoms significantly elevated in cases compared to controls (test-negative  
4 controls and/or population controls) during follow up are likely to be associated with COVID-19, and  
5 2 cases with these symptoms are in this study defined as cases with possible PCC condition (yes/no).  
6 3  
7 4 Severity scores of fatigue, dyspnea, cognitive functioning, and pain will be calculated. Scores of  
8 5 individuals with confirmed COVID-19 will be compared to those of controls, per follow-up moment  
9 6 (baseline, 3, 6, 9 and 12 months follow-up). Analyses will be controlled for age, gender, number of  
10 7 comorbidities and level of education. In a later stage symptom prevalence and severity in post-  
11 8 COVID-19 condition may be compared between different age groups including children vs adults.  
12 9  
13  
14  
15  
16  
17  
18  
19

## 10 **Secondary outcome analysis**

- 11 1. Effect of vaccination to SARS-CoV-2 at baseline on the prevalence and severity of persistent  
12 2 symptoms after SARS-CoV-2 infection

13 To assess the effect of vaccination for SARS-CoV-2 at baseline, prevalence of COVID-related  
14 3 symptoms, will be compared between fully vaccinated cases and cases that were partially vaccinated  
15 4 or unvaccinated at the time of their positive SARS-CoV-2 test.  
16 5

- 16 2. *Predictors of post-COVID 19 condition*

17 A prediction model will be built to identify predictors of possible post COVID-19 condition at each  
18 6 follow up moment or period separately. The outcome will be having possible post COVID-19  
19 7 condition as defined above. To determine the prediction model that best suits our data, the  
20 8 prediction model will be constructed using super learning (36). The prediction model will be  
21 9 evaluated using the ROC-AUC metric (37) and analyzed using explainable artificial intelligence (AI), in  
22 10 particular partial dependence plots and variable importance (38). For potential predictors to be  
23 11 included in the model see table S1.  
24 12

- 24 3. Predictors of healthcare utilization in post COVID-19 condition

25 A second prediction model will be performed to identify predictors of healthcare utilization in post  
26 13 COVID-19 condition. Healthcare utilization is defined as self -reported contact (visit to the general  
27 14 practitioner, telephone call, hospitalization, emergency healthcare services, other medical health  
28 15 professionals/services) with a health provider regarding symptoms attributed by the patient to  
29 16 COVID-19 or post COVID-19 condition (yes/no). The prediction model will be performed as described  
30 17 above and with similar predictors except for contact with the GP.  
31 18

- 31 4. Quality-adjusted life-years

1  
2  
3 1 HRQoL will be assessed using EQ-5D-5L and Rand-12/SF-6D. QALYs, which take into account both the  
4 2 impact of length and the quality-of-life will be calculated and be compared between cases and  
5 3 controls.

#### 8 4 ***Retrospective cohort***

9 5 Descriptive epidemiological statistical methods will be used to analyze the prevalence of persistent  
10 6 symptoms at baseline in cases in the retrospective cohort compared to both control groups (test-  
11 7 negative controls and population controls). Moreover, prevalence of co-morbidities will be  
12 8 quantified in cases and control groups. Additionally, an assessment into healthcare utilization for  
13 9 cases will be performed according to the aforementioned definition.

#### 10 11 ***Acute data following SARS CoV-2 infection***

11 12 Descriptive epidemiological statistical methods will be used to describe the prevalence and the type  
12 13 of symptoms present following acute infection as well as HRQoL.

#### 13 14 **Missing data**

14 15 The fraction of missing questionnaires at each time point and per period during the study (e.g. per 3  
15 16 months) in all patients with confirmed COVID-19 will be tabulated. Scenarios of dealing with missing  
16 17 data include a complete case analysis, multiple imputation, and linear interpolation combined with  
17 18 carry forward.

#### 18 19 **Ethics and dissemination**

19 20 All participants are required to consent to participate in the study. Informed consent will be  
20 21 obtained online prior to completing the study questionnaires. The Utrecht Medical Ethics Committee  
21 22 (METC) declared in February 2021 that the Medical Research Involving Human Subjects Act (WMO)  
22 23 does not apply to this study (METC protocol number 21-124/C). Results of this study will be  
23 24 submitted for publication in a peer-reviewed journal.

#### 24 25 **Discussion**

25 26 The LongCOVID-study aims to determine the prevalence and severity of persistent symptoms  
26 27 following acute SARS-CoV2 infection in cases compared to controls, as well as to investigate the risk  
27 28 factors for developing persistent symptoms. Previous studies have explored prevalence of long-term  
28 29 symptoms and risk factors in various populations, i.e. in previously hospitalized patients (39),  
29 30 patients with diabetes type 1 and 2 (40), in home-isolated patients with milder symptoms and in the  
30 31 young (41).

31 32 Blomberg et al. reported that 61% of all the patients had persisting symptoms at 6 months (41). This  
32 33 included patients with a mild to moderate illness following infection as well as young patients (16-30

1  
2  
3 1 years). Persisting symptoms included loss of taste and or smell, fatigue, dyspnea, impaired  
4  
5 2 concentration and memory problems. In a hospitalized population (39), fatigue, muscle weakness,  
6  
7 3 sleep difficulties and anxiety or depression were the most prevalent symptoms at 6 months. Due to  
8  
9 4 severe illness during hospital stay and impaired pulmonary function, the hospitalized population is a  
10  
11 5 target group for long-term recovery (39)). We expect that our study will include participants with  
12  
13 6 mostly mild to moderate acute symptoms and fewer patients that are hospitalized. This is due to the  
14  
15 7 design of the study, which enables recruitment from community health testing services, where  
16  
17 8 people go when they do not have severe disease. Therefore, our study is complementary to studies  
18  
19 9 with a focus on hospitalized patients, and more reflective of the impact of long-term symptoms in  
20  
21 10 patients with an initially relatively mild COVID-19.

22  
23 11 Strengths of the current study include the prospective design, allowing for detailed analysis of the  
24  
25 12 prevalence and risk factors of persistent symptoms of SARS CoV-2 infection. In addition this study is  
26  
27 13 one of a few studies (42) that allows for comparison between COVID-19 cases and control groups  
28  
29 14 that have similar experiences, such as lock down measures. This is important because such factors  
30  
31 15 can influence complaints. The availability of the population control group in this study allows us to  
32  
33 16 control for background prevalence of symptoms. Although a negative COVID-19 test does not  
34  
35 17 confirm infection by another respiratory pathogen, the use of test-negative controls gives us the  
36  
37 18 opportunity to assess to what extent the long-term symptoms after testing positive for COVID-19 are  
38  
39 19 more prevalent or severe than in a control group with acute symptoms that tests negative for  
40  
41 20 COVID-19. Another strength of this study is the recruitment of participants from the nationwide  
42  
43 21 community health testing centers, which enable a better representation of the general population.  
44  
45 22 The use of validated questionnaires with validated cut-off scores for severity is another strength of  
46  
47 23 this study. Repeated assessment of symptoms every three months during one year of follow-up will  
48  
49 24 enable assessment of the time course of symptoms, and detection of disabling symptoms at every 3  
50  
51 25 months interval. Furthermore, the impact of symptoms on general functioning will be assessed. A  
52  
53 26 limitation of this study is that severity scores of only four of symptoms associated with COVID-19 will  
54  
55 27 be calculated to get more insight into clinical significance. This is because only four standardized  
56  
57 28 questionnaires for symptom severity were included in the study. Hence the severity of other  
58  
59 29 possible symptoms related to COVID-19 will not be considered. Another limitation of this study is the  
60  
30 risk of lost to follow-up. Hence, we will perform several alternative substitution methods for missing  
31  
32 data to check the robustness of our results. The inability to determine for individual participants  
33  
34 whether self-reported symptoms are not as a result of other illnesses, is also a limitation in this  
study. In addition, no serological data is available in this study to investigate infections that may go  
unnoticed.

1  
2  
3 1 In conclusion, the LongCOVID-study is expected to provide additional insights into the prevalence  
4  
5 2 and severity of persistent symptoms after SARS CoV-2 infection to the international body of  
6  
7 3 literature. In the Netherlands this is the first large scale study on persisting symptoms following SARS  
8  
9 4 CoV2 infection.

10  
11 5  
12 6 **Contributors:** ENM wrote the manuscript. KYL contributed to the methods. CCW, TM, AJH, ADT, KYL,  
13  
14 7 ENM, AW contributed to the design of the study, LH and HK advised on the design of the  
15  
16 8 questionnaires, TM, AJH, ADT, KYL, EF, SB, CCW contributed to implementation of the data  
17  
18 9 collection, all authors reviewed and contributed to drafts of the manuscript. All authors read,  
19  
20 10 contributed to refinement of the study protocol and approved the manuscript.

21  
22 11 **Funding:** The study is executed by the National Institute for Public Health by order of the Ministry of  
23  
24 12 Health. This means the study is not the result of a competitive grant. The Dutch Ministry of Health,  
25  
26 13 Welfare and Sport does not have a role in the design of this study, its execution, analyses and  
27  
28 14 interpretation of results.

29  
30 15 **Competing interests:** The authors have no conflict of interest to declare.  
31  
32  
33  
34  
35  
36  
37  
38  
39  
40  
41  
42  
43  
44  
45  
46  
47  
48  
49  
50  
51  
52  
53  
54  
55  
56  
57  
58  
59  
60



## References

1. Alwan NA. Surveillance is underestimating the burden of the COVID-19 pandemic. *Lancet*. 2020;396(10252):e24.
2. Ricke DO. Two Different Antibody-Dependent Enhancement (ADE) Risks for SARS-CoV-2 Antibodies. *Front Immunol*. 2021;12:640093.
3. Cirulli ET, Schiabor Barrett KM, Riffle S, Bolze A, Neveux I, Dabe S, et al. Long-term COVID-19 symptoms in a large unselected population. *medRxiv*. 2020:2020.10.07.20208702.
4. Petersen MS, Kristiansen MF, Hanusson KD, Danielsen ME, B ÁS, Gaini S, et al. Long COVID in the Faroe Islands: A Longitudinal Study Among Nonhospitalized Patients. *Clin Infect Dis*. 2021;73(11):e4058-e63.
5. Ziauddeen N, Gurdasani D, O'Hara ME, Hastie C, Roderick P, Yao G, et al. Characteristics of Long Covid: findings from a social media survey. *medRxiv*. 2021:2021.03.21.21253968.
6. Holmes E, Wist J, Masuda R, Lodge S, Nitschke P, Kimhofer T, et al. Incomplete Systemic Recovery and Metabolic Phenoreversion in Post-Acute-Phase Nonhospitalized COVID-19 Patients: Implications for Assessment of Post-Acute COVID-19 Syndrome. *Journal of Proteome Research*. 2021;20(6):3315-29.
7. Mahase E. Covid-19: What do we know about "long covid"? *Bmj*. 2020;370:m2815.
8. Baig AM. Deleterious Outcomes in Long-Hauler COVID-19: The Effects of SARS-CoV-2 on the CNS in Chronic COVID Syndrome. *ACS Chem Neurosci*. 2020;11(24):4017-20.
9. Organization WH. A clinical case definition of post COVID-19 condition by a Delphi consensus [https://www.who.int/publications/i/item/WHO-2019-nCoV-Post\\_COVID-19\\_condition-Clinical\\_case\\_definition-2021.12021](https://www.who.int/publications/i/item/WHO-2019-nCoV-Post_COVID-19_condition-Clinical_case_definition-2021.12021) [
10. Soriano JB, Murthy S, Marshall JC, Relan P, Diaz JV. A clinical case definition of post-COVID-19 condition by a Delphi consensus. *Lancet Infect Dis*. 2022;22(4):e102-e7.
11. Ladds E, Rushforth A, Wieringa S, Taylor S, Rayner C, Husain L, et al. Persistent symptoms after Covid-19: qualitative study of 114 "long Covid" patients and draft quality principles for services. *BMC Health Serv Res*. 2020;20(1):1144.
12. Carfi A, Bernabei R, Landi F, Group ftGAC-P-ACS. Persistent Symptoms in Patients After Acute COVID-19. *JAMA*. 2020;324(6):603-5.
13. Rando HM, Bennett TD, Byrd JB, Bramante C, Callahan TJ, Chute CG, et al. Challenges in defining Long COVID: Striking differences across literature, Electronic Health Records, and patient-reported information. *medRxiv*. 2021:2021.03.20.21253896.
14. (RIVM) RvVeM. Risicofactoren voor COVID-19 (CONTEST) 2021 [Available from: <https://www.rivm.nl/coronavirus-covid-19/onderzoek/risicofactoren-contest-onderzoek>].
15. Lamers LM, Stalmeier PF, McDonnell J, Krabbe PF, van Busschbach JJ. [Measuring the quality of life in economic evaluations: the Dutch EQ-5D tariff]. *Ned Tijdschr Geneesk*. 2005;149(28):1574-8.
16. Luo X, George ML, Kakouras I, Edwards CL, Pietrobon R, Richardson W, et al. Reliability, validity, and responsiveness of the short form 12-item survey (SF-12) in patients with back pain. *Spine (Phila Pa 1976)*. 2003;28(15):1739-45.
17. Vercoulen JH, Swanink CM, Fennis JF, Galama JM, van der Meer JW, Bleijenbergh G. Dimensional assessment of chronic fatigue syndrome. *J Psychosom Res*. 1994;38(5):383-92.
18. Worm-Smeitink M, Gielissen M, Bloot L, van Laarhoven HWM, van Engelen BGM, van Riel P, et al. The assessment of fatigue: Psychometric qualities and norms for the Checklist individual strength. *J Psychosom Res*. 2017;98:40-6.
19. Ponds R VBM, Jolles J. De Cognitive Failure Questionnaire als maat voor subjectief cognitief functioneren. *Tijdschrift voor Neuropsychologie*. 2006(2):37-45.
20. Aaronson NK, Muller M, Cohen PD, Essink-Bot ML, Fekkes M, Sanderman R, et al. Translation, validation, and norming of the Dutch language version of the SF-36 Health Survey in community and chronic disease populations. *J Clin Epidemiol*. 1998;51(11):1055-68.
21. Williams N. The MRC breathlessness scale. *Occup Med (Lond)*. 2017;67(6):496-7.



- 1 22. Menges D, Ballouz T, Anagnostopoulos A, Aschmann HE, Domenghino A, Fehr JS, et al.  
2 Burden of post-COVID-19 syndrome and implications for healthcare service planning: A population-  
3 based cohort study. *PLoS One*. 2021;16(7):e0254523.
- 4 23. Broadbent E, Petrie KJ, Main J, Weinman J. The brief illness perception questionnaire. *J*  
5 *Psychosom Res*. 2006;60(6):631-7.
- 6 24. Zigmond AS, Snaith RP. The hospital anxiety and depression scale. *Acta Psychiatr Scand*.  
7 1983;67(6):361-70.
- 8 25. Morroy G, Peters JB, van Nieuwenhof M, Bor HH, Hautvast JL, van der Hoek W, et al. The  
9 health status of Q-fever patients after long-term follow-up. *BMC Infect Dis*. 2011;11:97.
- 10 26. Peters JB, Daudey L, Heijdra YF, Molema J, Dekhuijzen PN, Vercoulen JH. Development of a  
11 battery of instruments for detailed measurement of health status in patients with COPD in routine  
12 care: the Nijmegen Clinical Screening Instrument. *Qual Life Res*. 2009;18(7):901-12.
- 13 27. van Muilekom MM, Luijten MAJ, van Oers HA, Conijn T, Maurice-Stam H, van Goudoever JB,  
14 et al. Paediatric patients report lower health-related quality of life in daily clinical practice compared  
15 to new normative PedsQL(TM) data. *Acta Paediatr*. 2021;110(7):2267-79.
- 16 28. Varni JW, Beaujean AA, Limbers CA. Factorial invariance of pediatric patient self-reported  
17 fatigue across age and gender: a multigroup confirmatory factor analysis approach utilizing the  
18 PedsQL™ Multidimensional Fatigue Scale. *Qual Life Res*. 2013;22(9):2581-94.
- 19 29. Gordijn M, Cremers EM, Kaspers GJ, Gemke RJ. Fatigue in children: reliability and validity of  
20 the Dutch PedsQL™ Multidimensional Fatigue Scale. *Qual Life Res*. 2011;20(7):1103-8.
- 21 30. Huskisson EC. MEASUREMENT OF PAIN. *The Lancet*. 1974;304(7889):1127-31.
- 22 31. Wille N, Badia X, Bonsel G, Burström K, Cavrini G, Devlin N, et al. Development of the EQ-5D-  
23 Y: a child-friendly version of the EQ-5D. *Quality of Life Research*. 2010;19(6):875-86.
- 24 32. Yeatts KB, Stucky B, Thissen D, Irwin D, Varni JW, DeWitt EM, et al. Construction of the  
25 Pediatric Asthma Impact Scale (PAIS) for the Patient-Reported Outcomes Measurement Information  
26 System (PROMIS). *J Asthma*. 2010;47(3):295-302.
- 27 33. Irwin DE, Stucky B, Langer MM, Thissen D, Dewitt EM, Lai J-S, et al. An item response analysis  
28 of the pediatric PROMIS anxiety and depressive symptoms scales. *Quality of life research : an*  
29 *international journal of quality of life aspects of treatment, care and rehabilitation*. 2010;19(4):595-  
30 607.
- 31 34. Muris P, Meesters C, van den Berg F. The Strengths and Difficulties Questionnaire (SDQ).  
32 *European Child & Adolescent Psychiatry*. 2003;12(1):1-8.
- 33 35. Vrijmoeth HD, Ursinus J, Harms MG, Zomer TP, Gauw SA, Tulen AD, et al. Prevalence and  
34 determinants of persistent symptoms after treatment for Lyme borreliosis: study protocol for an  
35 observational, prospective cohort study (LymeProspect). *BMC Infect Dis*. 2019;19(1):324.
- 36 36. van der Laan MJ, Polley EC, Hubbard AE. Super learner. *Stat Appl Genet Mol Biol*.  
37 2007;6:Article25.
- 38 37. James G WD, Hastie T, Tibshirani R. *An Introduction to Statistical Learning : with Applications*  
39 *in R*. New York Springer; 2013.
- 40 38. Molnar C. *Interpretable Machine Learning: A Guide for Making Black Box Models*  
41 *Explainable*. 2nd ed. ed2022.
- 42 39. Huang C, Huang L, Wang Y, Li X, Ren L, Gu X, et al. 6-month consequences of COVID-19 in  
43 patients discharged from hospital: a cohort study. *Lancet*. 2021;397(10270):220-32.
- 44 40. Mittal J, Ghosh A, Bhatt SP, Anoop S, Ansari IA, Misra A. High prevalence of post COVID-19  
45 fatigue in patients with type 2 diabetes: A case-control study. *Diabetes Metab Syndr*.  
46 2021;15(6):102302.
- 47 41. Blomberg B, Mohn KG, Brokstad KA, Zhou F, Linchausen DW, Hansen BA, et al. Long COVID in  
48 a prospective cohort of home-isolated patients. *Nat Med*. 2021;27(9):1607-13.
- 49 42. Sandmann F, Tessier E, Lacy J, Kall M, Van Leeuwen E, Charlett A, et al. Long-term health-  
50 related quality of life in non-hospitalised COVID-19 cases with confirmed SARS-CoV-2 infection in

1  
2  
3  
4  
5  
6  
7  
8  
9  
10  
11  
12  
13  
14  
15  
16  
17  
18  
19  
20  
21  
22  
23  
24  
25  
26  
27  
28  
29  
30  
31  
32  
33  
34  
35  
36  
37  
38  
39  
40  
41  
42  
43  
44  
45  
46  
47  
48  
49  
50  
51  
52  
53  
54  
55  
56  
57  
58  
59  
60

1 England: Longitudinal analysis and cross-sectional comparison with controls. medRxiv.  
2 2021:2021.10.22.21264701.

3

4

5

For peer review only

Figure 1: Recruitment of participants in the LongCOVID-study

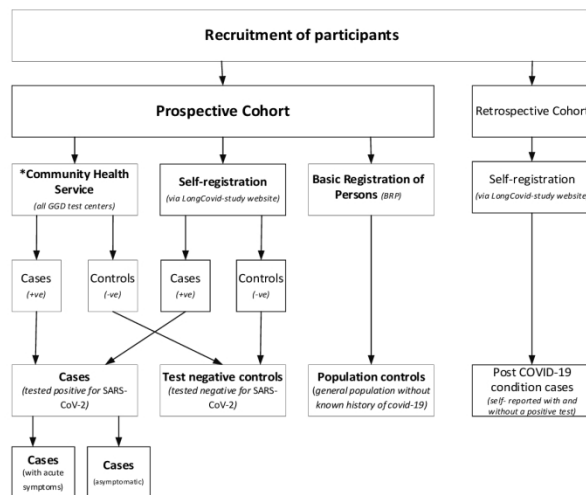

\*Cases and test negative controls were recruited via the community health services as part of the CONTEST study. Cases were also recruited via the community health services as part of Test and Trace.

Figure 1: Recruitment of participants in the LongCOVID-study

531x752mm (79 x 79 DPI)

## Supplementary files : S1 potential predictors

| <i>Potential predictor</i>                       | <i>Measuring instrument/responses</i>             |
|--------------------------------------------------|---------------------------------------------------|
| Health related quality of life (HRQoL)           | EQ-5D-5L                                          |
| Pain                                             | SF-36 subscale bodily pain                        |
| Education level                                  | low/moderate/high                                 |
| Body mass index (BMI)                            | Age/weight                                        |
| Employment                                       | yes/no                                            |
| Recurrent infection with coronavirus             | yes/no/unknown                                    |
| Age                                              | years                                             |
| Gender                                           | male/female                                       |
| Nationality                                      | Dutch/non-Dutch                                   |
| Smoking                                          | never smoked/former smoker/current smoker         |
| Region of residence                              | North/South/West/East                             |
| Number of household members                      | live alone/2/3-4/more than 4                      |
| Self-reported COVID-19 vaccination status        | fully vaccinated/not vaccinated/partly vaccinated |
| Type of vaccination received                     | Moderna/AstraZeneca/Pfizer/Jansen/combination     |
| Received a flu vaccination in the autumn of 2020 | yes/no/unknown                                    |
| Received pneumococcal vaccination                | yes/no/unknown                                    |
| Received pneumococcal vaccination                | yes/no/unknown                                    |
| Hospitalized due to COVID-19 infection           | yes/no                                            |
| Use of medication                                | yes/no                                            |
| Depressive symptoms                              | yes/no                                            |
| Anxiety symptoms                                 | yes/no                                            |
| Pregnancy                                        | yes/no/not applicable                             |
| Number of comorbidities                          | none/one/more than one                            |
| Respiratory comorbidities                        | yes/no                                            |
| Cardiovascular comorbidities                     | yes/no                                            |
| Hypertension                                     | yes/no                                            |
| Physical activity                                | IPAQ number of sitting hours                      |
| Test location                                    | hospital/self-test/ GGD/other                     |
| *Contact with the general practitioner (GP)      | yes/no                                            |
| Illness perception                               | brief IPQ                                         |

\*Contact with GP is excluded as a potential predictor in the prediction model for healthcare utilization in post COVID-19 condition

## STROBE Statement—checklist of items that should be included in reports of observational studies

|                              | Item No. | Recommendation                                                                                                                                                                                                                                                                                                                                                                                                                                                         | Page No. | Relevant text from manuscript                                                                                                          |
|------------------------------|----------|------------------------------------------------------------------------------------------------------------------------------------------------------------------------------------------------------------------------------------------------------------------------------------------------------------------------------------------------------------------------------------------------------------------------------------------------------------------------|----------|----------------------------------------------------------------------------------------------------------------------------------------|
| <b>Title and abstract</b>    | 1        | (a) Indicate the study's design with a commonly used term in the title or the abstract                                                                                                                                                                                                                                                                                                                                                                                 | 1        | Observational cohort                                                                                                                   |
|                              |          | (b) Provide in the abstract an informative and balanced summary of what was done and what was found                                                                                                                                                                                                                                                                                                                                                                    | 2        | Protocol for an observation cohort study, hence details of what will be done are provided in the abstract as well as in the manuscript |
| <b>Introduction</b>          |          |                                                                                                                                                                                                                                                                                                                                                                                                                                                                        |          |                                                                                                                                        |
| Background/rationale         | 2        | Explain the scientific background and rationale for the investigation being reported                                                                                                                                                                                                                                                                                                                                                                                   | 3-4      |                                                                                                                                        |
| Objectives                   | 3        | State specific objectives, including any prespecified hypotheses                                                                                                                                                                                                                                                                                                                                                                                                       | 4        |                                                                                                                                        |
| <b>Methods</b>               |          |                                                                                                                                                                                                                                                                                                                                                                                                                                                                        |          |                                                                                                                                        |
| Study design                 | 4        | Present key elements of study design early in the paper                                                                                                                                                                                                                                                                                                                                                                                                                | 4        |                                                                                                                                        |
| Setting                      | 5        | Describe the setting, locations, and relevant dates, including periods of recruitment, exposure, follow-up, and data collection                                                                                                                                                                                                                                                                                                                                        | 4-5      |                                                                                                                                        |
| Participants                 | 6        | (a) <i>Cohort study</i> —Give the eligibility criteria, and the sources and methods of selection of participants. Describe methods of follow-up<br><i>Case-control study</i> —Give the eligibility criteria, and the sources and methods of case ascertainment and control selection. Give the rationale for the choice of cases and controls<br><i>Cross-sectional study</i> —Give the eligibility criteria, and the sources and methods of selection of participants | 4-6      |                                                                                                                                        |
|                              |          | (b) <i>Cohort study</i> —For matched studies, give matching criteria and number of exposed and unexposed<br><i>Case-control study</i> —For matched studies, give matching criteria and the number of controls per case                                                                                                                                                                                                                                                 |          |                                                                                                                                        |
| Variables                    | 7        | Clearly define all outcomes, exposures, predictors, potential confounders, and effect modifiers. Give diagnostic criteria, if applicable                                                                                                                                                                                                                                                                                                                               | 5-9      |                                                                                                                                        |
| Data sources/<br>measurement | 8*       | For each variable of interest, give sources of data and details of methods of assessment (measurement). Describe comparability of assessment methods if there is more than one group                                                                                                                                                                                                                                                                                   | 5-9      |                                                                                                                                        |

1  
2  
3  
4  
5  
6  
7  
8  
9  
10  
11  
12  
13  
14  
15  
16  
17  
18  
19  
20  
21  
22  
23  
24  
25  
26  
27  
28  
29  
30  
31  
32  
33  
34  
35  
36  
37  
38  
39  
40  
41  
42  
43  
44  
45  
46

|            |    |                                                           |                                                                                                                                                                                                                     |
|------------|----|-----------------------------------------------------------|---------------------------------------------------------------------------------------------------------------------------------------------------------------------------------------------------------------------|
| Bias       | 9  | Describe any efforts to address potential sources of bias | The study makes use of two controls groups (negative controls and population controls) in an attempt to minimize selection bias. Questionnaires are completed every 3 months in an attempt to minimise recall bias. |
| Study size | 10 | Explain how the study size was arrived at                 | Our study is an ongoing prospective cohort study                                                                                                                                                                    |

Continued on next page

For peer review only

|                        |     |                                                                                                                                                                                                                                                                                                           |                                 |
|------------------------|-----|-----------------------------------------------------------------------------------------------------------------------------------------------------------------------------------------------------------------------------------------------------------------------------------------------------------|---------------------------------|
| Quantitative variables | 11  | Explain how quantitative variables were handled in the analyses. If applicable, describe which groupings were chosen and why                                                                                                                                                                              | 10-11                           |
| Statistical methods    | 12  | (a) Describe all statistical methods, including those used to control for confounding                                                                                                                                                                                                                     | 10-11                           |
|                        |     | (b) Describe any methods used to examine subgroups and interactions                                                                                                                                                                                                                                       | 10-11                           |
|                        |     | (c) Explain how missing data were addressed                                                                                                                                                                                                                                                               | 11                              |
|                        |     | (d) <i>Cohort study</i> —If applicable, explain how loss to follow-up was addressed<br><i>Case-control study</i> —If applicable, explain how matching of cases and controls was addressed<br><i>Cross-sectional study</i> —If applicable, describe analytical methods taking account of sampling strategy |                                 |
|                        |     | (e) Describe any sensitivity analyses                                                                                                                                                                                                                                                                     | 11                              |
| <b>Results</b>         |     |                                                                                                                                                                                                                                                                                                           |                                 |
| Participants           | 13* | (a) Report numbers of individuals at each stage of study—eg numbers potentially eligible, examined for eligibility, confirmed eligible, included in the study, completing follow-up, and analysed                                                                                                         | Protocol paper, no results yet. |
|                        |     | (b) Give reasons for non-participation at each stage                                                                                                                                                                                                                                                      | Protocol paper, no results yet  |
|                        |     | (c) Consider use of a flow diagram                                                                                                                                                                                                                                                                        |                                 |
| Descriptive data       | 14* | (a) Give characteristics of study participants (eg demographic, clinical, social) and information on exposures and potential confounders                                                                                                                                                                  | Protocol paper, no results yet  |
|                        |     | (b) Indicate number of participants with missing data for each variable of interest                                                                                                                                                                                                                       | Protocol paper, no results yet  |
|                        |     | (c) <i>Cohort study</i> —Summarise follow-up time (eg, average and total amount)                                                                                                                                                                                                                          | Protocol paper, no results yet  |
| Outcome data           | 15* | <i>Cohort study</i> —Report numbers of outcome events or summary measures over time                                                                                                                                                                                                                       | Protocol paper, no results yet  |
|                        |     | <i>Case-control study</i> —Report numbers in each exposure category, or summary measures of exposure                                                                                                                                                                                                      |                                 |
|                        |     | <i>Cross-sectional study</i> —Report numbers of outcome events or summary measures                                                                                                                                                                                                                        |                                 |
| Main results           | 16  | (a) Give unadjusted estimates and, if applicable, confounder-adjusted estimates and their precision (eg, 95% confidence interval). Make clear which confounders were adjusted for and why they were included                                                                                              | Protocol paper, no results yet  |
|                        |     | (b) Report category boundaries when continuous variables were categorized                                                                                                                                                                                                                                 | Protocol paper, no results yet  |
|                        |     | (c) If relevant, consider translating estimates of relative risk into absolute risk for a meaningful time period                                                                                                                                                                                          | Protocol paper, no results yet  |

Continued on next page

1  
2  
3  
4  
5  
6  
7  
8  
9  
10  
11  
12  
13  
14  
15  
16  
17  
18  
19  
20  
21  
22  
23  
24  
25  
26  
27  
28  
29  
30  
31  
32  
33  
34  
35  
36  
37  
38  
39  
40  
41  
42  
43  
44  
45  
46

|                          |    |                                                                                                                                                                            |                                |
|--------------------------|----|----------------------------------------------------------------------------------------------------------------------------------------------------------------------------|--------------------------------|
| Other analyses           | 17 | Report other analyses done—eg analyses of subgroups and interactions, and sensitivity analyses                                                                             | Protocol paper, no results yet |
| <b>Discussion</b>        |    |                                                                                                                                                                            |                                |
| Key results              | 18 | Summarise key results with reference to study objectives                                                                                                                   | Protocol paper, no results yet |
| Limitations              | 19 | Discuss limitations of the study, taking into account sources of potential bias or imprecision. Discuss both direction and magnitude of any potential bias                 | 12                             |
| Interpretation           | 20 | Give a cautious overall interpretation of results considering objectives, limitations, multiplicity of analyses, results from similar studies, and other relevant evidence | Protocol paper, no results yet |
| Generalisability         | 21 | Discuss the generalisability (external validity) of the study results                                                                                                      | Protocol paper, no results yet |
| <b>Other information</b> |    |                                                                                                                                                                            |                                |
| Funding                  | 22 | Give the source of funding and the role of the funders for the present study and, if applicable, for the original study on which the present article is based              | 13                             |

\*Give information separately for cases and controls in case-control studies and, if applicable, for exposed and unexposed groups in cohort and cross-sectional studies.

**Note:** An Explanation and Elaboration article discusses each checklist item and gives methodological background and published examples of transparent reporting. The STROBE checklist is best used in conjunction with this article (freely available on the Web sites of PLoS Medicine at <http://www.plosmedicine.org/>, Annals of Internal Medicine at <http://www.annals.org/>, and Epidemiology at <http://www.epidem.com/>). Information on the STROBE Initiative is available at [www.strobe-statement.org](http://www.strobe-statement.org).
