# Supplementary material for: Prevalence and determinants of persistent symptoms after infection with SARS-CoV-2: protocol for an observational cohort study (LongCOVID-study)
Source: PubMed Central journal article supplement — BMJ Open. 2022 Jul 1;12(7):e062439. doi: 10.1136/bmjopen-2022-062439 (PMC9251892; doi:10.1136/bmjopen-2022-062439), 2022-07-01
Supplement: bmjopen-2022-062439supp001.pdf [file bmjopen-2022-062439supp001.pdf]

**Supplementary files : S1 potential predictors**

| <i>Potential predictor</i>                       | <i>Measuring instrument/responses</i>             |
|--------------------------------------------------|---------------------------------------------------|
| Health related quality of life (HRQoL)           | EQ-5D-5L                                          |
| Pain                                             | SF-36 subscale bodily pain                        |
| Education level                                  | low/moderate/high                                 |
| Body mass index (BMI)                            | Age/weight                                        |
| Employment                                       | yes/no                                            |
| Recurrent infection with coronavirus             | yes/no/unknown                                    |
| Age                                              | years                                             |
| Gender                                           | male/female                                       |
| Nationality                                      | Dutch/non-Dutch                                   |
| Smoking                                          | never smoked/former smoker/current smoker         |
| Region of residence                              | North/South/West/East                             |
| Number of household members                      | live alone/2/3-4/more than 4                      |
| Self-reported COVID-19 vaccination status        | fully vaccinated/not vaccinated/partly vaccinated |
| Type of vaccination received                     | Moderna/AstraZeneca/Pfizer/Jansen/combination     |
| Received a flu vaccination in the autumn of 2020 | yes/no/unknown                                    |
| Received pneumococcal vaccination                | yes/no/unknown                                    |
| Received pneumococcal vaccination                | yes/no/unknown                                    |
| Hospitalized due to COVID-19 infection           | yes/no                                            |
| Use of medication                                | yes/no                                            |
| Depressive symptoms                              | yes/no                                            |
| Anxiety symptoms                                 | yes/no                                            |
| Pregnancy                                        | yes/no/not applicable                             |
| Number of comorbidities                          | none/one/more than one                            |
| Respiratory comorbidities                        | yes/no                                            |
| Cardiovascular comorbidities                     | yes/no                                            |
| Hypertension                                     | yes/no                                            |
| Physical activity                                | IPAQ number of sitting hours                      |
| Test location                                    | hospital/self-test/ GGD/other                     |
| *Contact with the general practitioner (GP)      | yes/no                                            |
| Illness perception                               | brief IPQ                                         |

\*Contact with GP is excluded as a potential predictor in the prediction model for healthcare utilization in post COVID-19 condition
